# Supplementary material
Source: PubMed Central journal article supplement (PMC5974185)
Supplement: 41431_2018_129_MOESM1_ESM.pdf [file 41431_2018_129_MOESM1_ESM.pdf]

**Table S1: Characteristics of the HSCR patients included in the study**

| <b>Samples</b>                    | <b>Relationship</b>                | <b>Gender</b>      | <b>Aganglionosis</b> | <b>Associated anomalies/others</b>                                                                                       | <b>Ethnicity</b> |
|-----------------------------------|------------------------------------|--------------------|----------------------|--------------------------------------------------------------------------------------------------------------------------|------------------|
| <b>HK9C*</b><br>HK9A<br>HK9B      | <b>Proband</b><br>Father<br>Mother | <b>M</b><br>M<br>F | <b>Long</b>          | <b>Necrotizing enterocolitis; asthma</b>                                                                                 | Chinese          |
| <b>HK96C*</b><br>HK96A<br>HK96B   | <b>Proband</b><br>Father<br>Mother | <b>M</b><br>M<br>F | <b>Total</b>         | Parathyroid nodules; bilateral hydrocele; <b>necrotizing enterocolitis</b>                                               | Chinese          |
| <b>HK97C*</b><br>HK97A<br>HK97B   | <b>Proband</b><br>Father<br>Mother | <b>M</b><br>M<br>F | <b>Long</b>          | Congenital central hypoventilation syndrome (CCHS); <b>necrotizing enterocolitis</b> ; mild mental retardation; epilepsy | Chinese          |
| <b>HK164C</b><br>HK164A<br>HK164B | <b>Proband</b><br>Father<br>Mother | <b>M</b><br>M<br>F | <b>Long</b>          | None; consanguineous parents                                                                                             | South-east Asian |
| <b>HD09C*</b><br>HD09A<br>HD09B   | <b>Proband</b><br>Father<br>Mother | <b>M</b><br>M<br>F | <b>Long</b>          | None                                                                                                                     | Chinese          |
| <b>VH105C</b><br>VH105A<br>VH105B | <b>Proband</b><br>Father<br>Mother | <b>M</b><br>M<br>F | <b>Long</b>          | None                                                                                                                     | Vietnamese       |
| <b>VH106C</b><br>VH106A<br>VH106B | <b>Proband</b><br>Father<br>Mother | <b>M</b><br>M<br>F | <b>Long</b>          | None                                                                                                                     | Vietnamese       |
| <b>VH108C</b><br>VH108A<br>VH108B | <b>Proband</b><br>Father<br>Mother | <b>M</b><br>M<br>F | <b>Long</b>          | None                                                                                                                     | Vietnamese       |
| <b>HK180C</b><br>HK180A<br>HK180B | <b>Proband</b><br>Father<br>Mother | <b>M</b><br>M<br>F | <b>Long</b>          | None                                                                                                                     | Chinese          |

\*Sample included in: MM Garcia-Barceló, CS Tang, *et al.* Genome-wide association study identifies *NRG1* as a susceptibility locus for Hirschsprung's disease. 2009. PNAS 106:2694-2699
