# Supplementary material
Source: PubMed Central journal article supplement (PMC5974185)
Supplement: 41431_2018_129_MOESM2_ESM.pdf [file 41431_2018_129_MOESM2_ESM.pdf]

Table S2: Summary of overall quality and variants identified in all samples sequenced

| Sample ID | Gender | Genome coverage (>=1X)* | Genome coverage depth | Genome coverage >= 5x (NA) | Genome coverage >= 10x (NA) | Genome coverage >= 20x (NA) | Genome coverage >= 40x (NA) | Exome coverage (>= 5x) (NA) | Exome coverage (>= 10x) (NA) | Exome coverage (>= 20x) (NA) | Exome coverage (>= 40x) (NA) | SNV total count | Homozygous SNV count | Heterozygous SNV count | SNV heterozygous/homozygous ratio | INS total count | DEL total count | Exome SNV total count | Exome homozygous SNV count | Exome heterozygous SNV count | Exome SNV heterozygous/homozygous ratio | Exome SNV transitions/transversions ratio | Exome INS total count | Exome DEL total count | Total CNV segments count | Total deletion segments count | Total duplication segments count | Exome deletion segments count | Exome duplication segments count |    |
|-----------|--------|-------------------------|-----------------------|----------------------------|-----------------------------|-----------------------------|-----------------------------|-----------------------------|------------------------------|------------------------------|------------------------------|-----------------|----------------------|------------------------|-----------------------------------|-----------------|-----------------|-----------------------|----------------------------|------------------------------|-----------------------------------------|-------------------------------------------|-----------------------|-----------------------|--------------------------|-------------------------------|----------------------------------|-------------------------------|----------------------------------|----|
| HD09A     | M      | 0.9719750               | 30.3418780            | 0.9635160                  | 0.9357090                   | 0.7751630                   | 0.0124160                   | 0.9799320                   | 0.9743010                    | 0.9126710                    | 0.1082440                    | 3,149,462       | 1,359,847            | 1,789,615              | 1.32                              | 2.15            | 125932          | 144566                | 17594                      | 7270                         | 10324                                   | 1.42                                      | 3.31                  | 96                    | 135                      | 1658                          | 1633                             | 25                            | 24                               | 11 |
| HD09B     | F      | 0.9665510               | 30.4995640            | 0.9610440                  | 0.9472960                   | 0.7935400                   | 0.0118940                   | 0.9780990                   | 0.9736890                    | 0.9221250                    | 0.0942500                    | 3,159,560       | 1,349,394            | 1,810,166              | 1.34                              | 2.14            | 126998          | 145296                | 17461                      | 7291                         | 10170                                   | 1.39                                      | 3.33                  | 95                    | 131                      | 1686                          | 1661                             | 25                            | 26                               | 8  |
| HD09C     | M      | 0.9723020               | 31.0611840            | 0.9640000                  | 0.9377460                   | 0.7792500                   | 0.0228240                   | 0.9791240                   | 0.9799170                    | 0.9052090                    | 0.1301710                    | 3,148,538       | 1,360,567            | 1,787,971              | 1.31                              | 2.15            | 126405          | 144799                | 17327                      | 7277                         | 10050                                   | 1.38                                      | 3.33                  | 96                    | 128                      | 1683                          | 1655                             | 26                            | 24                               | 10 |
| HK164A    | M      | 0.9766480               | 31.9722350            | 0.9722260                  | 0.9650030                   | 0.8941240                   | 0.1999750                   | 0.9803100                   | 0.9759480                    | 0.9298350                    | 0.1671180                    | 3,183,911       | 1,338,357            | 1,845,554              | 1.38                              | 2.15            | 127855          | 145558                | 17777                      | 7291                         | 10486                                   | 1.44                                      | 3.34                  | 86                    | 130                      | 1708                          | 1680                             | 28                            | 20                               | 8  |
| HK164B    | F      | 0.9712250               | 31.5230700            | 0.9669460                  | 0.9618970                   | 0.9179480                   | 0.1600910                   | 0.9790780                   | 0.9755400                    | 0.9453630                    | 0.1252080                    | 3,173,694       | 1,329,075            | 1,844,619              | 1.39                              | 2.15            | 127428          | 145531                | 17678                      | 7142                         | 10536                                   | 1.48                                      | 3.31                  | 101                   | 131                      | 1651                          | 1625                             | 26                            | 18                               | 8  |
| HK164C    | M      | 0.9767010               | 32.1093380            | 0.9722880                  | 0.9651800                   | 0.8947090                   | 0.2058300                   | 0.9799420                   | 0.9752700                    | 0.9290360                    | 0.1713010                    | 3,109,537       | 1,412,123            | 1,697,414              | 1.20                              | 2.15            | 125158          | 142490                | 17312                      | 7704                         | 9608                                    | 1.25                                      | 3.30                  | 97                    | 124                      | 1704                          | 1673                             | 31                            | 18                               | 8  |
| HK180A    | M      | 0.9766970               | 33.7336540            | 0.9725570                  | 0.9675950                   | 0.9191950                   | 0.2583910                   | 0.9797460                   | 0.9754480                    | 0.9385770                    | 0.2388310                    | 3,182,179       | 1,366,251            | 1,815,928              | 1.33                              | 2.15            | 128333          | 146779                | 17729                      | 7462                         | 10267                                   | 1.38                                      | 3.31                  | 96                    | 154                      | 1839                          | 1811                             | 28                            | 40                               | 11 |
| HK180B    | F      | 0.9712120               | 34.8553190            | 0.9672180                  | 0.9638070                   | 0.9496810                   | 0.2885610                   | 0.9788160                   | 0.9755550                    | 0.9620440                    | 0.2517600                    | 3,154,980       | 1,366,586            | 1,788,394              | 1.31                              | 2.15            | 127470          | 145377                | 17682                      | 7485                         | 10197                                   | 1.36                                      | 3.32                  | 96                    | 150                      | 1816                          | 1799                             | 27                            | 30                               | 6  |
| HK180C    | M      | 0.9767350               | 34.0695540            | 0.9725780                  | 0.9676800                   | 0.9201410                   | 0.2762630                   | 0.9796290                   | 0.9748730                    | 0.9345220                    | 0.2263010                    | 3,161,277       | 1,367,185            | 1,794,092              | 1.31                              | 2.15            | 127433          | 145991                | 17760                      | 7527                         | 10233                                   | 1.36                                      | 3.30                  | 95                    | 151                      | 1812                          | 1785                             | 27                            | 36                               | 10 |
| HK96A     | M      | 0.9765330               | 29.1882400            | 0.9716840                  | 0.9614710                   | 0.8666750                   | 0.0969530                   | 0.9796330                   | 0.9737100                    | 0.9128540                    | 0.0916850                    | 3,149,773       | 1,370,133            | 1,779,640              | 1.30                              | 2.15            | 125703          | 144492                | 17320                      | 7349                         | 9971                                    | 1.36                                      | 3.32                  | 101                   | 138                      | 1564                          | 1531                             | 33                            | 25                               | 9  |
| HK96B     | F      | 0.9708350               | 26.7097530            | 0.9659190                  | 0.9578010                   | 0.8529320                   | 0.0365360                   | 0.9783480                   | 0.9737270                    | 0.8822930                    | 0.0251200                    | 3,141,621       | 1,348,449            | 1,793,172              | 1.33                              | 2.15            | 124998          | 143271                | 17493                      | 7301                         | 10192                                   | 1.40                                      | 3.33                  | 95                    | 141                      | 1403                          | 1377                             | 26                            | 18                               | 8  |
| HK96C     | M      | 0.9764250               | 28.8411900            | 0.9715330                  | 0.9641070                   | 0.8621390                   | 0.0874780                   | 0.9795910                   | 0.9735220                    | 0.9058590                    | 0.0725310                    | 3,151,261       | 1,354,377            | 1,796,884              | 1.33                              | 2.15            | 125709          | 144328                | 17511                      | 7271                         | 10240                                   | 1.41                                      | 3.33                  | 99                    | 150                      | 1525                          | 1492                             | 33                            | 20                               | 11 |
| HK97A     | M      | 0.9761130               | 31.4372020            | 0.9718050                  | 0.9642360                   | 0.8907700                   | 0.1745480                   | 0.9791970                   | 0.9740500                    | 0.9279850                    | 0.1619240                    | 3,156,480       | 1,374,052            | 1,782,428              | 1.30                              | 2.15            | 126500          | 144721                | 17659                      | 7580                         | 10079                                   | 1.33                                      | 3.29                  | 100                   | 136                      | 1705                          | 1672                             | 33                            | 18                               | 11 |
| HK97B     | F      | 0.9707140               | 26.6072880            | 0.9659780                  | 0.9587390                   | 0.8541970                   | 0.0345440                   | 0.9782660                   | 0.9736520                    | 0.8736780                    | 0.0227670                    | 3,134,238       | 1,367,078            | 1,767,160              | 1.29                              | 2.15            | 125177          | 143632                | 17370                      | 7442                         | 9928                                    | 1.33                                      | 3.35                  | 98                    | 131                      | 1425                          | 1396                             | 29                            | 20                               | 7  |
| HK97C     | M      | 0.9759650               | 26.0086510            | 0.9705380                  | 0.9635520                   | 0.8107830                   | 0.0335520                   | 0.9790300                   | 0.9695810                    | 0.8589960                    | 0.0256450                    | 3,153,004       | 1,349,416            | 1,803,588              | 1.34                              | 2.15            | 125008          | 143889                | 17675                      | 7437                         | 10238                                   | 1.38                                      | 3.32                  | 99                    | 136                      | 1370                          | 1344                             | 26                            | 21                               | 8  |
| HK9A      | M      | 0.9763050               | 29.1478540            | 0.9695430                  | 0.9437520                   | 0.7748620                   | 0.2011470                   | 0.9797440                   | 0.9707010                    | 0.8976360                    | 0.3913950                    | 3,111,786       | 1,360,449            | 1,751,337              | 1.29                              | 2.15            | 123662          | 141750                | 17495                      | 7390                         | 10105                                   | 1.37                                      | 3.32                  | 95                    | 139                      | 1435                          | 1408                             | 27                            | 26                               | 10 |
| HK9B      | F      | 0.9710900               | 30.1195180            | 0.9665810                  | 0.9605200                   | 0.8929660                   | 0.1343660                   | 0.9786880                   | 0.9748750                    | 0.9146220                    | 0.0924240                    | 3,137,051       | 1,360,894            | 1,776,157              | 1.31                              | 2.15            | 125221          | 143969                | 17383                      | 7388                         | 9995                                    | 1.35                                      | 3.34                  | 94                    | 133                      | 1590                          | 1566                             | 24                            | 25                               | 8  |
| HK9C      | M      | 0.9763980               | 28.7427060            | 0.9716050                  | 0.9611640                   | 0.8552080                   | 0.1005550                   | 0.9793500                   | 0.9719380                    | 0.8823950                    | 0.0630540                    | 3,146,136       | 1,349,292            | 1,796,844              | 1.33                              | 2.15            | 125527          | 143955                | 17356                      | 7448                         | 9908                                    | 1.33                                      | 3.36                  | 99                    | 137                      | 1550                          | 1521                             | 26                            | 11                               | 11 |
| VH105A    | M      | 0.9768990               | 35.2993870            | 0.9728770                  | 0.9684900                   | 0.9261920                   | 0.3347790                   | 0.9804880                   | 0.9769320                    | 0.9447570                    | 0.3108220                    | 3,168,753       | 1,367,108            | 1,801,645              | 1.32                              | 2.15            | 127752          | 146505                | 17675                      | 7378                         | 10297                                   | 1.40                                      | 3.33                  | 97                    | 142                      | 1905                          | 1868                             | 37                            | 37                               | 13 |
| VH105B    | F      | 0.9712160               | 35.7900170            | 0.9674190                  | 0.9641480                   | 0.9525240                   | 0.3364020                   | 0.9794770                   | 0.9764540                    | 0.9467210                    | 0.2805120                    | 3,164,210       | 1,359,200            | 1,805,010              | 1.33                              | 2.15            | 127072          | 145421                | 17447                      | 7408                         | 10039                                   | 1.36                                      | 3.36                  | 97                    | 131                      | 1887                          | 1863                             | 24                            | 26                               | 11 |
| VH105C    | M      | 0.9765490               | 34.7282560            | 0.9725590                  | 0.9680740                   | 0.9242060                   | 0.3069420                   | 0.9801330                   | 0.9766390                    | 0.9406610                    | 0.2451930                    | 3,164,760       | 1,360,698            | 1,804,062              | 1.33                              | 2.15            | 127419          | 145651                | 17533                      | 7402                         | 10131                                   | 1.37                                      | 3.37                  | 95                    | 140                      | 1855                          | 1824                             | 31                            | 34                               | 14 |
| VH106A    | M      | 0.9770480               | 32.6897850            | 0.9724760                  | 0.9665290                   | 0.9115940                   | 0.2102870                   | 0.9788310                   | 0.9727580                    | 0.9238700                    | 0.1694270                    | 3,152,394       | 1,370,468            | 1,781,926              | 1.30                              | 2.15            | 127057          | 145459                | 17423                      | 7328                         | 10095                                   | 1.38                                      | 3.26                  | 96                    | 136                      | 1720                          | 1690                             | 30                            | 19                               | 8  |
| VH106B    | F      | 0.9714360               | 35.5017510            | 0.9674710                  | 0.9641360                   | 0.9520080                   | 0.3204010                   | 0.9794750                   | 0.9783400                    | 0.9647100                    | 0.2557280                    | 3,168,478       | 1,356,101            | 1,812,377              | 1.34                              | 2.15            | 127970          | 146198                | 17444                      | 7291                         | 10153                                   | 1.39                                      | 3.34                  | 107                   | 150                      | 1889                          | 1862                             | 27                            | 29                               | 12 |
| VH106C    | M      | 0.9767380               | 36.2468350            | 0.9728930                  | 0.9688130                   | 0.9291950                   | 0.3870850                   | 0.9804230                   | 0.9776450                    | 0.9504170                    | 0.3923190                    | 3,162,811       | 1,356,100            | 1,806,711              | 1.33                              | 2.14            | 127621          | 145744                | 17278                      | 7300                         | 9978                                    | 1.37                                      | 3.33                  | 97                    | 136                      | 1925                          | 1898                             | 27                            | 22                               | 10 |
| VH108A    | M      | 0.9769910               | 35.6378300            | 0.9730220                  | 0.9686860                   | 0.9269410                   | 0.3516360                   | 0.9808950                   | 0.9780390                    | 0.9512650                    | 0.4015600                    | 3,167,037       | 1,355,607            | 1,811,430              | 1.34                              | 2.15            | 127934          | 146134                | 17526                      | 7423                         | 10103                                   | 1.36                                      | 3.34                  | 89                    | 119                      | 1812                          | 1781                             | 31                            | 22                               | 8  |
| VH108B    | F      | 0.9710830               | 35.5512010            | 0.9669610                  | 0.9626940                   | 0.9354560                   | 0.3549800                   | 0.9798600                   | 0.9777690                    | 0.9688800                    | 0.4854350                    | 3,154,767       | 1,362,750            | 1,792,017              | 1.32                              | 2.15            | 126796          | 145390                | 17451                      | 7373                         | 10078                                   | 1.37                                      | 3.32                  | 105                   | 125                      | 1779                          | 1746                             | 33                            | 22                               | 11 |
| VH108C    | M      | 0.9771120               | 34.4773380            | 0.9729710                  | 0.9683280                   | 0.9233170                   | 0.2912230                   | 0.9808160                   | 0.9774140                    | 0.9430260                    | 0.2489700                    | 3,168,381       | 1,360,284            | 1,808,097              | 1.33                              | 2.15            | 127888          | 146374                | 17599                      | 7242                         | 10357                                   | 1.43                                      | 3.38                  | 90                    | 120                      | 1786                          | 1760                             | 26                            | 23                               | 10 |

\*using Picard CollectWgMetrics with minimum base quality and mapping quality of 20

|         |           |           |           |           |           |           |           |           |           |           |  |                                       |     |           |           |         |        |  |  |  |  |    |     |       |  |  |  |  |
|---------|-----------|-----------|-----------|-----------|-----------|-----------|-----------|-----------|-----------|-----------|--|---------------------------------------|-----|-----------|-----------|---------|--------|--|--|--|--|----|-----|-------|--|--|--|--|
| Sum     |           |           |           |           |           |           |           |           |           |           |  | 85,176,079                            | Sum | 3,418,026 | 3,912,990 |         |        |  |  |  |  |    |     |       |  |  |  |  |
|         |           |           |           |           |           |           |           |           |           |           |  | 92,507,095                            |     |           |           |         |        |  |  |  |  |    |     |       |  |  |  |  |
| Avarace | 0.9742684 | 31.958911 | 0.9694892 | 0.9605654 | 0.8846565 | 0.1936181 | 0.9795378 | 0.9748437 | 0.9254817 | 0.1945443 |  | 3,154,670                             |     |           | 126,594   | 144,926 | 17,517 |  |  |  |  | 97 | 136 | 1,692 |  |  |  |  |
|         |           |           |           |           |           |           |           |           |           |           |  | 3,426,189                             |     |           |           |         |        |  |  |  |  |    |     |       |  |  |  |  |
|         |           |           |           |           |           |           |           |           |           |           |  | Average of SNVs and Indels per genome |     |           |           |         |        |  |  |  |  |    |     |       |  |  |  |  |
