# Supplementary material
Source: PubMed Central journal article supplement (PMC5974185)
Supplement: 41431_2018_129_MOESM3_ESM.pdf [file 41431_2018_129_MOESM3_ESM.pdf]

**Table S3: List of 117 ENS-related HSCR candidate genes**

| Pathways             | Gene           | Chromosome   | Evidence                                        | Reference     |
|----------------------|----------------|--------------|-------------------------------------------------|---------------|
| Others               | <i>ALDH1A2</i> | 15q22.1      | Mouse (Absence EN)                              | [1]           |
| Others               | <i>ARHGEF3</i> | 3p14.3       | Expression                                      | [2-3]         |
| Ret signaling        | <i>ARTN</i>    | 1p34.1       | Mouse (Abnormal ENS morphology)                 | [4]           |
| Notch signaling      | <i>ASCL1</i>   | 12q23.2      | Mouse (Absence EN)/Expression                   | [3,5-7]       |
| Others               | <i>CADMI</i>   | 11q23.2      | Expression                                      | [3,8]         |
| Others               | <i>CARTPT</i>  | 5q13.2       | Expression                                      | [3]           |
| Others               | <i>CBR1</i>    | 21q22.13     | Expression                                      | [9]           |
| Others               | <i>CDH2</i>    | 18q11.2      | Expression                                      | [3,10]        |
| Semophorin signaling | <i>CRMP1</i>   | 4p16.1       | Expression                                      | [3,11]        |
| Others               | <i>CSTB</i>    | 21q22.3      | Expression                                      | [12]          |
| Others               | <i>CTNNA1</i>  | 9q31.3       | Expression                                      | [3]           |
| Others               | <i>DCC</i>     | 18q21.2      | Mouse (Absence submucosal ganglia)              | [13]          |
| Others               | <i>DCX</i>     | Xq22.3-q23   | Expression                                      | [3]           |
| Notch signaling      | <i>DLL1</i>    | 6q27         | Not described                                   | [6-7]         |
| Notch signaling      | <i>DLL3</i>    | 19q13.2      | Not described                                   | [6-7]         |
| Others               | <i>DLX1</i>    | 2q32         | Expression                                      | [3,14-15]     |
| Others               | <i>DPYSL3</i>  | 5q32         | Expression                                      | [3,16]        |
| Others               | <i>EBF3</i>    | 10q26.3      | Expression                                      | [3,17]        |
| Others               | <i>ECE1</i>    | 1p36         | Human (Linkage)/Mouse (Absence EN)              | [13, 18-19]   |
| Ednrb signaling      | <i>EDN3</i>    | 20q13        | Human (Linkage)/Mouse (Absence EN)              | [13,18,20-21] |
| Ednrb signaling      | <i>EDNRB</i>   | 13q22        | Human (Linkage/CNV)/Mouse (Absence EN)          | [13,18,22-23] |
| Others               | <i>ELAVL2</i>  | 9p21         | Expression                                      | [3,24]        |
| Others               | <i>ELAVL4</i>  | 1p34         | Expression                                      | [3,25]        |
| Neuregulin signaling | <i>ERBB2</i>   | 17q12        | Mouse (Abnormal ENS morphology)                 | [26-27]       |
| Neuregulin signaling | <i>ERBB3</i>   | 12q13.2      | Mouse (Abnormal ENS morphology)                 | [26-27]       |
| Neuregulin signaling | <i>ERBB4</i>   | 2q33.3-q34   | Human (CNV)                                     | [28]          |
| Others               | <i>ETV1</i>    | 7p21.3       | Expression                                      | [3, 29]       |
| Others               | <i>FGF13</i>   | Xq26.3       | Expression                                      | [3,30]        |
| Others               | <i>GAP43</i>   | 3q13.1-q13.2 | Expression                                      | [3,31]        |
| Ret signaling        | <i>GDNF</i>    | 5p13         | Human (Linkage)/Mouse (Absence EN)/Expression   | [13,18,32-35] |
| Ret signaling        | <i>GFRA1</i>   | 10q25        | Human (1 patient)/Mouse (Absence EN)/Expression | [3-4, 34,36]  |
| Ret signaling        | <i>GFRA2</i>   | 8p21.3       | Mouse (Abnormal ENS morphology)                 | [4]           |
| Ret signaling        | <i>GFRA3</i>   | 5q11.2       | Mouse (Abnormal sympathetic system)             | [4]           |
| Ret signaling        | <i>GFRA4</i>   | 20p13        | Not described                                   | [4]           |
| Hedgehog signaling   | <i>GLI1</i>    | 12q13.3      | Mouse (Abnormal intestinal morphology)          | [37-38]       |
| Hedgehog signaling   | <i>GLI2</i>    | 2q14         | Mouse (Abnormal intestinal morphology)          | [37-38]       |

**Table S3: List of 117 ENS-related HSCR candidate genes**

| <b>Pathways</b>      | <b>Gene</b>     | <b>Chromosome</b> | <b>Evidence</b>                                                      | <b>Reference</b> |
|----------------------|-----------------|-------------------|----------------------------------------------------------------------|------------------|
| Hedgehog signaling   | <i>GLI3</i>     | 7p14              | Mouse (Abnormal intestinal morphology)                               | [37-38]          |
| Others               | <i>GNG2</i>     | 14q21             | Expression                                                           | [3]              |
| Others               | <i>GNG3</i>     | 11p11             | Expression                                                           | [3,39]           |
| Others               | <i>GRB10</i>    | 7p12.2            | Human (Linkage)                                                      | [34]             |
| Hedgehog signaling   | <i>HES1</i>     | 3q29              | Mouse (Abnormal intestinal morphology)                               | [37-38]          |
| Others               | <i>HLX</i>      | 1q41              | Mouse (Hypoaganglionosis)                                            | [13]             |
| Others               | <i>HMP19</i>    | 5q35.2            | Expression                                                           | [3]              |
| Others               | <i>HMX3</i>     | 10q26.13          | Expression                                                           | [3,40]           |
| Others               | <i>HOXB5</i>    | 17q21.3           | Expression                                                           | [3,41]           |
| Others               | <i>HOXD4</i>    | 2q31.1            | Expression                                                           | [3,42]           |
| Others               | <i>IFNGR2</i>   | 21q22.11          | Expression                                                           | [43]             |
| Hedgehog signaling   | <i>IHH</i>      | 2q35              | Mouse (Absence EN)                                                   | [37-38]          |
| Others               | <i>IKBKAP</i>   | 9q31.3            | Human (Co-Expression)                                                | [44]             |
| Others               | <i>IL10RB</i>   | 21q22.11          | Expression                                                           | [45]             |
| Others               | <i>ITGB1</i>    | 10p11.22          | Mouse (Absence EN)                                                   | [13]             |
| Notch signaling      | <i>JAG1</i>     | 20p12.1           | Not described                                                        | [6-7]            |
| Notch signaling      | <i>JAG2</i>     | 14q32.33          | Not described                                                        | [6-7]            |
| Others               | <i>KIAA1279</i> | 10q21             | Human (Linkage/GSM syndrome)                                         | [46]             |
| Hedgehog signaling   | <i>KLF4</i>     | 9q31              | Mouse (Abnormal intestinal morphology)                               | [37-38]          |
| Others               | <i>LICAM</i>    | Xq28              | Human (Hydrocephalus)/Mouse (Delayed NCC differentiation)/Expression | [3,47-49]        |
| Others               | <i>MAB21L1</i>  | 13q13             | Expression                                                           | [3,50]           |
| Others               | <i>MAPK10</i>   | 4q22.1-q23        | Expression                                                           | [3,51]           |
| Others               | <i>MAPT</i>     | 17q21.1           | Expression                                                           | [3]              |
| Others               | <i>MLLT11</i>   | 1q21              | Expression                                                           | [3,52]           |
| Others               | <i>NAV2</i>     | 11p15.1           | Human (Exome)                                                        | [53]             |
| Others               | <i>NKX2-1</i>   | 14q13             | Human (Case report)                                                  | [13,18]          |
| Notch signaling      | <i>NOTCH1</i>   | 9q34              | Not described                                                        | [6-7]            |
| Notch signaling      | <i>NOTCH2</i>   | 6q27              | Not described                                                        | [6-7]            |
| Notch signaling      | <i>NOTCH3</i>   | 19p13.12          | Not described                                                        | [6-7]            |
| Neuregulin signaling | <i>NRG1</i>     | 8p12              | Human (GWAS)/Mouse (Abnormal NCC migration)                          | [54]             |
| Neuregulin signaling | <i>NRG3</i>     | 10q22-q23         | Human (CNV/Exome)                                                    | [28,55]          |
| Semophorin signaling | <i>NRP1</i>     | 10p11.22          | Not described                                                        | [56-57]          |
| Others               | <i>NRTN</i>     | 19p13             | Human (Linkage)/Mouse (Abnormal ENS)                                 | [58]             |
| Others               | <i>NTF3</i>     | 1p36.11           | Mouse (Reduced enteric ganglia)                                      | [13]             |
| Others               | <i>NTRK3</i>    | 15q25             | Mouse (Reduced enteric ganglia)                                      | [13]             |
| Ret signaling        | <i>PAX3</i>     | 2q36              | Human (Exome)/Mouse (Absence EN)                                     | [4,53]           |

**Table S3: List of 117 ENS-related HSCR candidate genes**

| <b>Pathways</b>         | <b>Gene</b>     | <b>Chromosome</b> | <b>Evidence</b>                                         | <b>Reference</b> |
|-------------------------|-----------------|-------------------|---------------------------------------------------------|------------------|
| Others                  | <i>PCDHA1</i>   | 5q31              | Expression                                              | [3,59]           |
| Others                  | <i>PFKL</i>     | 21q22.3           | Expression                                              | [60]             |
| Others                  | <i>PHACTR4</i>  | 1p35.3            | Mouse                                                   | [61-62]          |
| Others                  | <i>PHOX2A</i>   | 11q13.2           | Expression                                              | [3,63]           |
| Others                  | <i>PHOX2B</i>   | 4p13              | Human (Haddad syndrome)/Mouse (Abnormal ENS)/Expression | [3,64-65]        |
| Semophorin signaling    | <i>PLXNA1</i>   | 3q21.3            | Not described                                           | [56-57]          |
| Semophorin signaling    | <i>PLXNB1</i>   | 3p21              | Human (Linkage)                                         | [66-67]          |
| Notch signaling         | <i>POFUT1</i>   | 20q11.21          | Mouse (Absence EN)                                      | [6-7]            |
| Prokinecticin signaling | <i>PROK1</i>    | 1p13              | Not described                                           | [68-69]          |
| Prokinecticin signaling | <i>PROK2</i>    | 3p13              | Not described                                           | [68-69]          |
| Prokinecticin signaling | <i>PROKR1</i>   | 2p14              | Not described                                           | [68-69]          |
| Prokinecticin signaling | <i>PROKR2</i>   | 20p12             | Not described                                           | [68-69]          |
| Others                  | <i>PRPH</i>     | 12q12-q13         | Expression                                              | [3,70]           |
| Ret signaling           | <i>PSPN</i>     | 19p13.3           | Not described                                           | [4]              |
| Hedgehog signaling      | <i>PTCH1</i>    | 9q22.32           | Mouse (Abnormal intestinal morphology)                  | [37-38]          |
| Ret signaling           | <i>RET</i>      | 10q11             | Human (Linkage/CNV/Exome)/Mouse (Absence EN)            | [3,53,71-72]     |
| Others                  | <i>SALL4</i>    | 20q13.2           | Mouse (Absence EN)                                      | [13]             |
| Others                  | <i>SCG3</i>     | 15q21             | Expression                                              | [3]              |
| Semophorin signaling    | <i>SEMA3A</i>   | 7p12              | Human (Association)/Mouse (Abnormal ENS morphology)     | [53,73]          |
| Semophorin signaling    | <i>SEMA3C</i>   | 7p12              | Human (GWAS)/Others (Not described)                     | [56-57]          |
| Semophorin signaling    | <i>SEMA3D</i>   | 7p12              | Human (GWAS)/Others (Not described)                     | [56-57]          |
| Others                  | <i>SERPINI1</i> | 3q26.1            | Expression                                              | [3,74-75]        |
| Hedgehog signaling      | <i>SHH</i>      | 7q36              | Mouse (Ectopic enteric ganglia formation)               | [37-38]          |
| Hedgehog signaling      | <i>SMO</i>      | 7q32              | Mouse (Abnormal neural crest cell migration)            | [37-38]          |
| Others                  | <i>SOD1</i>     | 21q22.11          | Expression                                              | [76-77]          |
| Others                  | <i>SON</i>      | 21q22.11          | Expression                                              | [78]             |
| Others                  | <i>SOX10</i>    | 22q13             | Human (Linkage/WS4)/Mouse (Absence EN)                  | [3,79]           |
| Others                  | <i>SOX2</i>     | 3q26.3-q27        | Expression                                              | [3,80]           |
| Others                  | <i>SPRY2</i>    | 13q31.1           | Mouse (Increased EN)                                    | [13]             |
| Others                  | <i>STMN2</i>    | 8q21.13           | Expression                                              | [3,81]           |
| Others                  | <i>STMN3</i>    | 20q13.3           | Expression                                              | [3]              |
| Hedgehog signaling      | <i>SUFU</i>     | 10q24.32          | Mouse (Abnormal neural tube morphology)                 | [37-38]          |
| Others                  | <i>SYT11</i>    | 1q21.2            | Expression                                              | [3,82]           |
| Others                  | <i>TAGLN3</i>   | 3q13.2            | Expression                                              | [3]              |
| Others                  | <i>TBX3</i>     | 12q24.1           | Expression                                              | [83-84]          |
| Others                  | <i>TFF3</i>     | 21q22.3           | Expression                                              | [3,85-86]        |

**Table S3: List of 117 ENS-related HSCR candidate genes**

| Pathways | Gene          | Chromosome | Evidence                                                       | Reference |
|----------|---------------|------------|----------------------------------------------------------------|-----------|
| Others   | <i>TGFB2</i>  | 1q41       | Expression                                                     | [3,87]    |
| Others   | <i>TMEFF2</i> | 2q32.3     | Expression                                                     | [3,88]    |
| Others   | <i>TREX1</i>  | 3p21.31    | Human (Linkage)                                                | [66-67]   |
| Others   | <i>TTC3</i>   | 21q22.2    | Expression                                                     | [89]      |
| Others   | <i>TUBB3</i>  | 16q24.3    | Expression                                                     | [3,90]    |
| Others   | <i>UCHL1</i>  | 4p14       | Expression                                                     | [3,91]    |
| Others   | <i>VIP</i>    | 6q25       | Expression                                                     | [3,92]    |
| Others   | <i>ZEB2</i>   | 2q22       | Human (Linkage/MW syndrome/CNV)/Mouse (Abnormal NCC migration) | [93-95]   |
| Others   | <i>ZIC2</i>   | 13q32      | Mouse                                                          | [96-97]   |

Notes: updated gene symbols used for ZFHX1B (replaced by ZEB2), TRKC (replaced by NTRK3) and RALDH2 (replaced by ALDH1A2); 'EN' means enteric neurons; 'NCC' means neural crest cells

| References to TableS3 |                                                 |                                                                                                                                  |                                              |
|-----------------------|-------------------------------------------------|----------------------------------------------------------------------------------------------------------------------------------|----------------------------------------------|
|                       | <i>Authors</i>                                  | <i>Title</i>                                                                                                                     | <i>Journal</i>                               |
| 1                     | Anderson, R. B., D. F. Newgreen, et al. (2006). | Neural crest and the development of the enteric nervous system.                                                                  | Adv Exp Med Biol 589: 181-196.               |
| 2                     | Thiesen, S., S. Kubart, et al. (2000).          | Isolation of two novel human RhoGEFs, ARHGEF3 and ARHGEF4, in 3p13-21 and 2q22.                                                  | Biochem Biophys Res Commun 273(1): 364-369.  |
| 3                     | Heanue, T. A. and V. Pachnis (2006).            | Expression profiling the developing mammalian enteric nervous system identifies marker and candidate Hirschsprung disease genes. | Proc Natl Acad Sci U S A 103(18): 6919-6924. |
| 4                     | Pachnis, V., P. Durbec, et al. (1998).          | Role Of the RET signal transduction pathway in development of the mammalian enteric nervous system.                              | Am J Physiol 275(2 Pt 1): G183-186.          |
| 5                     | Huang, H. S., G. M. Kubish, et al. (2010).      | Direct transcriptional induction of Gadd45gamma by Ascl1 during neuronal differentiation.                                        | Mol Cell Neurosci 44(3): 282-296.            |
| 6                     | Okamura, Y. and Y. Saga (2008).                 | Notch signaling is required for the maintenance of enteric neural crest progenitors.                                             | Development 135(21): 3555-3565.              |
| 7                     | Morrison, S. J., S. E. Perez, et al. (2000).    | Transient Notch activation initiates an irreversible switch from neurogenesis to gliogenesis by neural crest stem cells.         | Cell 101(5): 499-510.                        |
| 8                     | Hagiwara, M., N. Ichiyanagi, et al. (2009).     | Expression of a soluble isoform of cell adhesion molecule 1 in the brain and its involvement in directional neurite outgrowth.   | Am J Pathol 174(6): 2278-2289.               |
| 9                     | Sultan, M., I. Piccini, et al. (2007).          | Gene expression variation in Down's syndrome mice allows prioritization of candidate genes.                                      | Genome Biol 8(5): R91.                       |
| 10                    | Hermiston, M. L. and J. I. Gordon (1995).       | Inflammatory bowel disease and adenomas in mice expressing a dominant negative N-cadherin.                                       | Science 270(5239): 1203-1207.                |

|    |                                                      |                                                                                                                                                                                |                                              |
|----|------------------------------------------------------|--------------------------------------------------------------------------------------------------------------------------------------------------------------------------------|----------------------------------------------|
| 11 | Schmidt, E. F., S. O. Shim, et al. (2008).           | Release of MICAL autoinhibition by semaphorin-plexin signaling promotes interaction with collapsin response mediator protein.                                                  | J Neurosci 28(9): 2287-2297.                 |
| 12 | Brannvall, K., H. Hjelm, et al. (2003).              | Cystatin-B is expressed by neural stem cells and by differentiated neurons and astrocytes.                                                                                     | Biochem Biophys Res Commun 308(2): 369-374.  |
| 13 | Heanue, T. A. and V. Pachnis (2007).                 | Enteric nervous system development and Hirschsprung's disease: advances in genetic and stem cell studies.                                                                      | Nat Rev Neurosci 8(6): 466-479.              |
| 14 | Simeone, A., D. Acampora, et al. (1994).             | Cloning and characterization of two members of the vertebrate Dlx gene family.                                                                                                 | Proc Natl Acad Sci U S A 91(6): 2250-2254.   |
| 15 | Cobos, I., U. Borello, et al. (2007).                | Dlx transcription factors promote migration through repression of axon and dendrite growth.                                                                                    | Neuron 54(6): 873-888.                       |
| 16 | Hamajima, N., K. Matsuda, et al. (1996).             | A novel gene family defined by human dihydropyrimidinase and three related proteins with differential tissue distribution.                                                     | Gene 180(1-2): 157-163.                      |
| 17 | Zardo, G., M. I. Tiirikainen, et al. (2002).         | Integrated genomic and epigenomic analyses pinpoint biallelic gene inactivation in tumors.                                                                                     | Nat Genet 32(3): 453-458.                    |
| 18 | Amiel, J. and S. Lyonnet (2001).                     | Hirschsprung disease, associated syndromes, and genetics: a review.                                                                                                            | J Med Genet 38(11): 729-739.                 |
| 19 | Hofstra, R. M., O. Valdenaire, et al. (1999).        | A loss-of-function mutation in the endothelin-converting enzyme 1 (ECE-1) associated with Hirschsprung disease, cardiac defects, and autonomic dysfunction.                    | Am J Hum Genet 64(1): 304-308.               |
| 20 | Bidaud, C., R. Salomon, et al. (1997).               | Mutations of the endothelin-3 gene in isolated and syndromic forms of Hirschsprung disease.                                                                                    | Gastroenterol Clin Biol 21(8-9): 548-554.    |
| 21 | Sanchez-Mejias, A., R. M. Fernandez, et al. (2009).  | Contribution of RET, NTRK3 and EDN3 to the expression of Hirschsprung disease in a multiplex family.                                                                           | J Med Genet 46(12): 862-864.                 |
| 22 | Carrasquillo, M. M., A. S. McCallion, et al. (2002). | Genome-wide association study and mouse model identify interaction between RET and EDNRB pathways in Hirschsprung disease.                                                     | Nat Genet 32(2): 237-244.                    |
| 23 | Kenny, S. E., R. M. Hofstra, et al. (2000).          | Reduced endothelin-3 expression in sporadic Hirschsprung disease.                                                                                                              | Br J Surg 87(5): 580-585.                    |
| 24 | Han, J., J. F. Knops, et al. (1996).                 | Localization of human elav-like neuronal protein 1 (Hel-N1) on chromosome 9p21 by chromosome microdissection polymerase chain reaction and fluorescence in situ hybridization. | Genomics 36(1): 189-191.                     |
| 25 | Akamatsu, W., H. Fujihara, et al. (2005).            | The RNA-binding protein HuD regulates neuronal cell identity and maturation.                                                                                                   | Proc Natl Acad Sci U S A 102(12): 4625-4630. |
| 26 | Paratore, C., D. E. Goerich, et al. (2001).          | Survival and glial fate acquisition of neural crest cells are regulated by an interplay between the transcription factor Sox10 and extrinsic combinatorial signaling.          | Development 128(20): 3949-3961.              |
| 27 | Britsch, S. (2007).                                  | The neuregulin-I/ErbB signaling system in development and disease.                                                                                                             | Adv Anat Embryol Cell Biol 190: 1-65.        |
| 28 | Garcia-Barcelo, M. M., C. S. Tang, et al. (2009).    | Genome-wide association study identifies NRG1 as a susceptibility locus for Hirschsprung's disease.                                                                            | Proc Natl Acad Sci U S A 106(8): 2694-2699.  |
| 29 | Flames, N. and O. Hobert (2009).                     | Gene regulatory logic of dopamine neuron differentiation.                                                                                                                      | Nature 458(7240): 885-889.                   |

|    |                                                     |                                                                                                                                                              |                                             |
|----|-----------------------------------------------------|--------------------------------------------------------------------------------------------------------------------------------------------------------------|---------------------------------------------|
| 30 | Smallwood, P. M., I. Munoz-Sanjuan, et al. (1996).  | Fibroblast growth factor (FGF) homologous factors: new members of the FGF family implicated in nervous system development.                                   | Proc Natl Acad Sci U S A 93(18): 9850-9857. |
| 31 | Strittmatter, S. M., C. Fankhauser, et al. (1995).  | Neuronal pathfinding is abnormal in mice lacking the neuronal growth cone protein GAP-43.                                                                    | Cell 80(3): 445-452.                        |
| 32 | Salomon, R., T. Attie, et al. (1996).               | Germline mutations of the RET ligand GDNF are not sufficient to cause Hirschsprung disease.                                                                  | Nat Genet 14(3): 345-347.                   |
| 33 | Ivanchuk, S. M., S. M. Myers, et al. (1996).        | De novo mutation of GDNF, ligand for the RET/GDNFR-alpha receptor complex, in Hirschsprung disease.                                                          | Hum Mol Genet 5(12): 2023-2026.             |
| 34 | Angrist, M., S. Bolk, et al. (1998).                | Genomic structure of the gene for the SH2 and pleckstrin homology domain-containing protein GRB10 and evaluation of its role in Hirschsprung disease.        | Oncogene 17(23): 3065-3070.                 |
| 35 | Fernandez, R. M., M. Ruiz-Ferrer, et al. (2008).    | Polymorphisms in the genes encoding the 4 RET ligands, GDNF, NTN, ARTN, PSPN, and susceptibility to Hirschsprung disease.                                    | J Pediatr Surg 43(11): 2042-2047.           |
| 36 | Myers, S. M., R. Salomon, et al. (1999).            | Investigation of germline GFR alpha-1 mutations in Hirschsprung disease.                                                                                     | J Med Genet 36(3): 217-220.                 |
| 37 | Fu, M., V. C. Lui, et al. (2004).                   | Sonic hedgehog regulates the proliferation, differentiation, and migration of enteric neural crest cells in gut.                                             | J Cell Biol 166(5): 673-684.                |
| 38 | Reichenbach, B., J. M. Delalande, et al. (2008).    | Endoderm-derived Sonic hedgehog and mesoderm Hand2 expression are required for enteric nervous system development in zebrafish.                              | Dev Biol 318(1): 52-64.                     |
| 39 | Hurowitz, E. H., J. M. Melnyk, et al. (2000).       | Genomic characterization of the human heterotrimeric G protein alpha, beta, and gamma subunit genes.                                                         | DNA Res 7(2): 111-120.                      |
| 40 | Bober, E., C. Baum, et al. (1994).                  | A novel NK-related mouse homeobox gene: expression in central and peripheral nervous structures during embryonic development.                                | Dev Biol 162(1): 288-303.                   |
| 41 | Fu, M., V. C. Lui, et al. (2003).                   | HOXB5 expression is spatially and temporarily regulated in human embryonic gut during neural crest cell colonization and differentiation of enteric neurons. | Dev Dyn 228(1): 1-10.                       |
| 42 | Mavilio, F., A. Simeone, et al. (1986).             | Differential and stage-related expression in embryonic tissues of a new human homoeobox gene.                                                                | Nature 324(6098): 664-668.                  |
| 43 | Murai, M., O. Turovskaya, et al. (2009).            | Interleukin 10 acts on regulatory T cells to maintain expression of the transcription factor Foxp3 and suppressive function in mice with colitis.            | Nat Immunol 10(11): 1178-1184.              |
| 44 | Bolk, S., A. Pelet, et al. (2000).                  | A human model for multigenic inheritance: phenotypic expression in Hirschsprung disease requires both the RET gene and a new 9q31 locus.                     | Proc Natl Acad Sci U S A 97(1): 268-273.    |
| 45 | Glocker, E. O., D. Kotlarz, et al. (2009).          | Inflammatory bowel disease and mutations affecting the interleukin-10 receptor.                                                                              | N Engl J Med 361(21): 2033-2045.            |
| 46 | Brooks, A. S., A. M. Bertoli-Avella, et al. (2005). | Homozygous nonsense mutations in KIAA1279 are associated with malformations of the central and enteric nervous systems.                                      | Am J Hum Genet 77(1): 120-126.              |
| 47 | Griseri, P., Y. Vos, et al. (2009).                 | Complex pathogenesis of Hirschsprung's disease in a patient with hydrocephalus, vesico-ureteral reflux and a balanced translocation (2;17)(12;11).           | Eur J Hum Genet 17(4): 483-490.             |
| 48 | Turner, K. N., M. Schachner, et al. (2009).         | Cell adhesion molecule L1 affects the rate of differentiation of enteric neurons in the developing gut.                                                      | Dev Dyn 238(3): 708-715.                    |

|    |                                                   |                                                                                                                                               |                                                                                                                                                                  |
|----|---------------------------------------------------|-----------------------------------------------------------------------------------------------------------------------------------------------|------------------------------------------------------------------------------------------------------------------------------------------------------------------|
| 49 | Kenwrick, S., A. Watkins, et al. (2000).          | Neural cell recognition molecule L1: relating biological complexity to human disease mutations.                                               | Hum Mol Genet 9(6): 879-886.                                                                                                                                     |
| 50 | Mariani, M., D. Baldessari, et al. (1999).        | Two murine and human homologs of mab-21, a cell fate determination gene involved in <i>Caenorhabditis elegans</i> neural development.         | Hum Mol Genet 8(13): 2397-2406.                                                                                                                                  |
| 51 | Gupta, S., T. Barrett, et al. (1996).             | Selective interaction of JNK protein kinase isoforms with transcription factors.                                                              | EMBO J 15(11): 2760-2770.                                                                                                                                        |
| 52 | Tse, W., W. Zhu, et al. (1995).                   | A novel gene, AF1q, fused to MLL in t(1;11) (q21;q23), is specifically expressed in leukemic and immature hematopoietic cells.                | Blood 85(3): 650-656.                                                                                                                                            |
| 53 | T. Turner, K. D. Nguyen, et al. (2013).           | The burden of coding, non-coding and chromosomal mutations in Hirschsprung disease                                                            | ASHG 2013 abstract;<br><a href="http://www.ashg.org/2013meeting/abstracts/abstracts/120121724">http://www.ashg.org/2013meeting/abstracts/abstracts/120121724</a> |
| 54 | Garcia-Barcelo, M. M., C. S. Tang, et al. (2009). | Genome-wide association study identifies NRG1 as a susceptibility locus for Hirschsprung's disease.                                           | Proc Natl Acad Sci U S A 106(8): 2694-2699.                                                                                                                      |
| 55 | Yang J, Duan S, et al. (2013)                     | Exome sequencing identified NRG3 as a novel susceptible gene of Hirschsprung's disease in a Chinese population.                               | Mol Neurobiol 47(3): 957-966                                                                                                                                     |
| 56 | Jiang, Q., S. Arnold et al (2015)                 | Functional Loss of Semaphorin 3C and/or Semaphorin 3D and their Epistatic Interaction with Ret are Critical to Hirschsprung Disease Liability | Am J Hum Genet 96: 581-596.                                                                                                                                      |
| 57 | Kruger, R. P., J. Aurandt, et al. (2005).         | Semaphorins command cells to move.                                                                                                            | Nat Rev Mol Cell Biol 6(10): 789-800.                                                                                                                            |
| 58 | Doray, B., R. Salomon, et al. (1998).             | Mutation of the RET ligand, neurturin, supports multigenic inheritance in Hirschsprung disease.                                               | Hum Mol Genet 7(9): 1449-1452.                                                                                                                                   |
| 59 | Sugino, H., S. Hamada, et al. (2000).             | Genomic organization of the family of CNR cadherin genes in mice and humans.                                                                  | Genomics 63(1): 75-87.                                                                                                                                           |
| 60 | Elson, A., D. Levanon, et al. (1994).             | Overexpression of liver-type phosphofructokinase (PFKL) in transgenic-PFKL mice: implication for gene dosage in trisomy 21.                   | Biochem J 299 ( Pt 2): 409-415.                                                                                                                                  |
| 61 | Allen, P. B., A. T. Greenfield, et al. (2004).    | Phactrs 1-4: A family of protein phosphatase 1 and actin regulatory proteins.                                                                 | Proc Natl Acad Sci U S A 101(18): 7187-7192.                                                                                                                     |
| 62 | Kim, T. H., J. Goodman, et al. (2007).            | Phactr4 regulates neural tube and optic fissure closure by controlling PP1-, Rb-, and E2F1-regulated cell-cycle progression.                  | Dev Cell 13(1): 87-102.                                                                                                                                          |
| 63 | Sasaki, A., M. Kanai, et al. (2003).              | Molecular analysis of congenital central hypoventilation syndrome.                                                                            | Hum Genet 114(1): 22-26.                                                                                                                                         |
| 64 | Garcia-Barcelo, M., M. H. Sham, et al. (2003).    | Association study of PHOX2B as a candidate gene for Hirschsprung's disease.                                                                   | Gut 52(4): 563-567.                                                                                                                                              |
| 65 | Ou-Yang, M. C., S. N. Yang, et al. (2007).        | Concomitant existence of total bowel aganglionosis and congenital central hypoventilation syndrome in a neonate with PHOX2B gene mutation.    | J Pediatr Surg 42(2): e9-11.                                                                                                                                     |
| 66 | Gabriel, S. B., R. Salomon, et al. (2002).        | Segregation at three loci explains familial and population risk in Hirschsprung disease.                                                      | Nat Genet 31(1): 89-93.                                                                                                                                          |
| 67 | Garcia-Barcelo, M. M., P. Y. Fong, et al. (2008). | Mapping of a Hirschsprung's disease locus in 3p21.                                                                                            | Eur J Hum Genet 16(7): 833-840.                                                                                                                                  |

|    |                                                |                                                                                                                                                     |                                        |
|----|------------------------------------------------|-----------------------------------------------------------------------------------------------------------------------------------------------------|----------------------------------------|
| 68 | Ngan, E. S., C. K. Shum, et al. (2008).        | Prokineticin-1 (Prok-1) works coordinately with glial cell line-derived neurotrophic factor (GDNF) to mediate proliferation and differentiation of  | Biochim Biophys Acta 1783(3): 467-478. |
| 69 | Ngan, E. S., K. Y. Lee, et al. (2007).         | Prokineticin-1 modulates proliferation and differentiation of enteric neural crest cells.                                                           | Biochim Biophys Acta 1773(4): 536-545. |
| 70 | Oblinger, M. M., J. Wong, et al. (1989).       | Axotomy-induced changes in the expression of a type III neuronal intermediate filament gene.                                                        | J Neurosci 9(11): 3766-3775.           |
| 71 | Edery, P., S. Lyonnet, et al. (1994).          | Mutations of the RET proto-oncogene in Hirschsprung's disease.                                                                                      | Nature 367(6461): 378-380.             |
| 72 | Emison, E. S., A. S. McCallion, et al. (2005). | A common sex-dependent mutation in a RET enhancer underlies Hirschsprung disease risk.                                                              | Nature 434(7035): 857-863.             |
| 73 | Behar, O., J. A. Golden, et al. (1996).        | Semaphorin III is needed for normal patterning and growth of nerves, bones and heart.                                                               | Nature 383(6600): 525-528.             |
| 74 | Stoeckli, E. T., P. F. Lemkin, et al. (1989).  | Identification of proteins secreted from axons of embryonic dorsal-root-ganglia neurons.                                                            | Eur J Biochem 180(2): 249-258.         |
| 75 | Lee, M. S., D. H. Jun, et al. (2006).          | Selection of neural differentiation-specific genes by comparing profiles of random differentiation.                                                 | Stem Cells 24(8): 1946-1955.           |
| 76 | Moldrich, R. X., L. Dauphinot, et al. (2009).  | Proliferation deficits and gene expression dysregulation in Down's syndrome (Ts1Cje) neural progenitor cells cultured from neurospheres.            | J Neurosci Res 87(14): 3143-3152.      |
| 77 | Le Pecheur, M., E. Bourdon, et al. (2005).     | Oxidized SOD1 alters proteasome activities in vitro and in the cortex of SOD1 overexpressing mice.                                                  | FEBS Lett 579(17): 3613-3618.          |
| 78 | Wynn, S. L., R. A. Fisher, et al. (2000).      | Organization and conservation of the GART/SON/DONSON locus in mouse and human genomes.                                                              | Genomics 68(1): 57-62.                 |
| 79 | Southard-Smith, E. M., L. Kos, et al. (1998).  | Sox10 mutation disrupts neural crest development in Dom Hirschsprung mouse model.                                                                   | Nat Genet 18(1): 60-64.                |
| 80 | Bylund, M., E. Andersson, et al. (2003).       | Vertebrate neurogenesis is counteracted by Sox1-3 activity.                                                                                         | Nat Neurosci 6(11): 1162-1168.         |
| 81 | Bahn, S., M. Mimmack, et al. (2002).           | Neuronal target genes of the neuron-restrictive silencer factor in neurospheres derived from fetuses with Down's syndrome: a gene expression study. | Lancet 359(9303): 310-315.             |
| 82 | Craxton, M. (2001).                            | Genomic analysis of synaptotagmin genes.                                                                                                            | Genomics 77(1-2): 43-49.               |
| 83 | Han, J., P. Yuan, et al. (2010).               | Tbx3 improves the germ-line competency of induced pluripotent stem cells.                                                                           | Nature 463(7284): 1096-1100.           |
| 84 | Paulsen, F. P., C. W. Woon, et al. (2008).     | Intestinal trefoil factor/TFF3 promotes re-epithelialization of corneal wounds.                                                                     | J Biol Chem 283(19): 13418-13427.      |
| 85 | Mashimo, H., D. C. Wu, et al. (1996).          | Impaired defense of intestinal mucosa in mice lacking intestinal trefoil factor.                                                                    | Science 274(5285): 262-265.            |
| 86 | Bottner, M., K. Krieglstein, et al. (2000).    | The transforming growth factor-betas: structure, signaling, and roles in nervous system development and functions.                                  | J Neurochem 75(6): 2227-2240.          |

|    |                                                 |                                                                                                                                          |                                   |
|----|-------------------------------------------------|------------------------------------------------------------------------------------------------------------------------------------------|-----------------------------------|
| 87 | Krieglstein, K., J. Strelau, et al. (2002).     | TGF-beta and the regulation of neuron survival and death.                                                                                | J Physiol Paris 96(1-2): 25-30.   |
| 88 | Eib, D. W., T. M. Holling, et al. (2000).       | Expression of the follistatin/EGF-containing transmembrane protein M7365 (tomoregulin-1) during mouse development.                       | Mech Dev 97(1-2): 167-171.        |
| 89 | Tsukahara, F., M. Hattori, et al. (1996).       | Identification and cloning of a novel cDNA belonging to tetratricopeptide repeat gene family from Down syndrome-critical region 21q22.2. | J Biochem 120(4): 820-827.        |
| 90 | Mongroo, P. S. and A. K. Rustgi (2010).         | The role of the miR-200 family in epithelial-mesenchymal transition.                                                                     | Cancer Biol Ther 10(3): 219-222.  |
| 91 | Sakurai, M., K. Ayukawa, et al. (2006).         | Ubiquitin C-terminal hydrolase L1 regulates the morphology of neural progenitor cells and modulates their differentiation.               | J Cell Sci 119(Pt 1): 162-171.    |
| 92 | Larsson, L. T. (1994).                          | Hirschsprung's disease--immunohistochemical findings.                                                                                    | Histol Histopathol 9(3): 615-629. |
| 93 | Wakamatsu, N., Y. Yamada, et al. (2001).        | Mutations in SIP1, encoding Smad interacting protein-1, cause a form of Hirschsprung disease.                                            | Nat Genet 27(4): 369-370.         |
| 94 | Amiel, J., Y. Espinosa-Parrilla, et al. (2001). | Large-scale deletions and SMADIP1 truncating mutations in syndromic Hirschsprung disease with involvement of midline structures.         | Am J Hum Genet 69(6): 1370-1377.  |
| 95 | Van de Putte, T., A. Francis, et al. (2007).    | Neural crest-specific removal of Zfhx1b in mouse leads to a wide range of neurocristopathies reminiscent of Mowat-Wilson syndrome.       | Hum Mol Genet 16(12): 1423-1436.  |
| 96 | Nagai, T., J. Aruga, et al. (1997).             | The expression of the mouse Zic1, Zic2, and Zic3 gene suggests an essential role for Zic genes in body pattern formation.                | Dev Biol 182(2): 299-313.         |
| 97 | Sanchez-Camacho, C. and P. Bovolenta (2008).    | Autonomous and non-autonomous Shh signalling mediate the in vivo growth and guidance of mouse retinal ganglion cell axons.               | Development 135(21): 3531-3541.   |
