# Supplementary material
Source: PubMed Central journal article supplement (PMC5974185)
Supplement: 41431_2018_129_MOESM4_ESM.pdf [file 41431_2018_129_MOESM4_ESM.pdf]

**Table S4: Summary of coding and selected non-coding *de novo* indels and non-synonymous SNVs**

| Gene                                                            | Candidate HSCR gene (listed in Table S3) | Mutation (most severe among all isoforms) | Mutation type | Patient ID | Verified by Sanger sequencing | Expressed in enteric neural crest cells<br><small>nrcourse*</small> | Frequency in internal controls (N=493) | Maximum frequency across all public databases | TP>20 true positive phredscore GATK | Residual Variation Intolerance Score (RVIS) | Sorting Tolerant From Intolerant (SIFT) | Polymorphism Phenotyping (Polyphen2_HDIV) | Combined Annotation Dependent Depletion score (CADD) |
|-----------------------------------------------------------------|------------------------------------------|-------------------------------------------|---------------|------------|-------------------------------|---------------------------------------------------------------------|----------------------------------------|-----------------------------------------------|-------------------------------------|---------------------------------------------|-----------------------------------------|-------------------------------------------|------------------------------------------------------|
| <b><i>De novo</i> coding variants</b>                           |                                          |                                           |               |            |                               |                                                                     |                                        |                                               |                                     |                                             |                                         |                                           |                                                      |
| <i>CCT2</i>                                                     | No                                       | NC_000012.11:g.69993654G>A                | missense      | HD09C      | Yes                           | Yes                                                                 | 0                                      | 0                                             | 41                                  | 11.05%                                      | D                                       | D                                         | 32                                                   |
| <i>VASH1</i>                                                    | No                                       | NC_000014.8:g.77242233A>G                 | splicing      | HD09C      | Yes                           | Yes                                                                 | 0                                      | 0                                             | 39                                  | 25.70%                                      | NA                                      | NA                                        | 23.9                                                 |
| <i>CYP26A1</i>                                                  | No                                       | NG_008067.1:g.7481A>G                     | missense      | HK9C       | Yes                           | Yes                                                                 | 0                                      | 0                                             | 40                                  | 10.02%                                      | T                                       | B                                         | 18.47                                                |
| <i>PKD1L2</i>                                                   | No                                       | NG_033236.1:g.84039G>A                    | synonymous    | HD09C      | Yes                           | No                                                                  | 0                                      | 0                                             | 43                                  | 98.71%                                      | NA                                      | NA                                        | 9.129                                                |
| <i>TMEM175</i>                                                  | No                                       | NC_000004.11:g.952275C>T                  | synonymous    | HK9C       | Yes                           | Yes                                                                 | 0                                      | 8.83E-06                                      | 55                                  | 98.56%                                      | NA                                      | NA                                        | 11.94                                                |
| <i>CSMD3</i>                                                    | No                                       | NC_000008.10:g.113841961T>C               | missense      | VH105C     | Yes                           | No                                                                  | 0                                      | 8.13E-06                                      | 58                                  | 0.13%                                       | T                                       | B                                         | 7.16                                                 |
| <i>CCDC82</i>                                                   | No                                       | NC_000011.9:g.96117858A>T                 | synonymous    | VH108C     | Yes                           | Yes                                                                 | 0                                      | 0                                             | 63                                  | 74.54%                                      | NA                                      | NA                                        | 0.773                                                |
| <b><i>De novo</i> non-coding variants in selected ENS genes</b> |                                          |                                           |               |            |                               |                                                                     |                                        |                                               |                                     |                                             |                                         |                                           |                                                      |
| <i>NRG1</i>                                                     | Yes                                      | NG_012005.2:g.667454G>C                   | SNV           | VH106C     | Yes                           | Yes                                                                 | 0                                      | 0                                             | 49                                  | NA                                          | NA                                      | NA                                        | 1.46                                                 |
| <i>NRG1</i>                                                     | Yes                                      | NG_012005.2:g.92222G>T                    | SNV           | HK164C     | Yes                           | Yes                                                                 | 0                                      | 0                                             | 37                                  | NA                                          | NA                                      | NA                                        | 0.679                                                |
| <i>NRG1</i>                                                     | Yes                                      | NG_012005.2:g.146124A>G                   | SNV           | VH108C     | Yes                           | Yes                                                                 | 0                                      | 0                                             | 55                                  | NA                                          | NA                                      | NA                                        | 3.126                                                |
| <i>ERBB4</i>                                                    | Yes                                      | NG_011805.1:g.835055_835059delAAACA       | indel         | VH106C     | Yes                           | Yes                                                                 | 0                                      | 0                                             | 40                                  | NA                                          | NA                                      | NA                                        | 6.129                                                |
| <i>SEMA3A</i>                                                   | Yes                                      | NG_011489.1:g.210732delT                  | indel         | VH106C     | Yes                           | Yes                                                                 | 0                                      | 0                                             | 32                                  | NA                                          | NA                                      | NA                                        | 1.407                                                |
| <i>ZEB2</i>                                                     | Yes                                      | NC_000002.11:g.145137510C>T               | SNV           | HK164C     | Yes                           | Yes                                                                 | 0                                      | 0                                             | 55                                  | NA                                          | NA                                      | NA                                        | NA                                                   |
| <i>DCC</i>                                                      | Yes                                      | NG_013341.2:g.651331G>A                   | SNV           | HK180C     | Yes                           | Yes                                                                 | 0                                      | 0                                             | 41                                  | NA                                          | NA                                      | NA                                        | 0.668                                                |

D: damaging; B: benign; T: tolerated; NA: not applicable; \*In-house unpublished data
