# Supplementary material
Source: PubMed Central journal article supplement (PMC5974185)
Supplement: 41431_2018_129_MOESM5_ESM.pdf [file 41431_2018_129_MOESM5_ESM.pdf]

Table S5: Summary of all *de novo* variants identified. For SNVs and Indels, only those with Transmission Probability (TP) Phred score >20 were considered.

| Sample ID | CNV (>50 base pairs) |        | Total <i>de novo</i> CNVs per patient/child | Average of <i>de novo</i> CNVs per individual | Average of <i>de novo</i> <b>genic</b> CNVs per individual | Small deletions |        | Small insertions |        | SNV |        | Total <i>de novo</i> SNV/indels per patient/child | Average of <i>de novo</i> SNV/indels per individual | Average of <i>de novo</i> exonic SNV/indels per individual |
|-----------|----------------------|--------|---------------------------------------------|-----------------------------------------------|------------------------------------------------------------|-----------------|--------|------------------|--------|-----|--------|---------------------------------------------------|-----------------------------------------------------|------------------------------------------------------------|
|           | NCD                  | Exonic |                                             |                                               |                                                            | NCD             | Exonic | NCD              | Exonic | NCD | Exonic |                                                   |                                                     |                                                            |
| HK9C      | 0                    | 0      | 0                                           |                                               |                                                            | 3               | 0      | 2                | 0      | 34  | 2      | 41                                                |                                                     |                                                            |
| HK96C     | 0                    | 0      | 0                                           |                                               |                                                            | 7               | 0      | 0                | 0      | 59  | 0      | 66                                                |                                                     |                                                            |
| HK97C     | 0                    | 0      | 0                                           |                                               |                                                            | 4               | 0      | 1                | 0      | 49  | 0      | 54                                                |                                                     |                                                            |
| HK164C    | 0                    | 0      | 0                                           |                                               |                                                            | 3               | 0      | 3                | 0      | 64  | 0      | 70                                                |                                                     |                                                            |
| HD09C     | 0                    | 0      | 0                                           | 0                                             | 0                                                          | 3               | 0      | 0                | 0      | 40  | 3      | 46                                                | 59                                                  | 0.777777778                                                |
| VH105C    | 0                    | 0      | 0                                           |                                               |                                                            | 5               | 0      | 2                | 0      | 69  | 1      | 77                                                |                                                     |                                                            |
| VH106C    | 0                    | 0      | 0                                           |                                               |                                                            | 5               | 0      | 4                | 0      | 54  | 0      | 63                                                |                                                     |                                                            |
| VH108C    | 0                    | 0      | 0                                           |                                               |                                                            | 2               | 0      | 2                | 0      | 41  | 1      | 46                                                |                                                     |                                                            |
| HK180C    | 0                    | 0      | 0                                           |                                               |                                                            | 3               | 0      | 2                | 0      | 63  | 0      | 68                                                |                                                     |                                                            |
|           | 0                    | 0      | 0                                           |                                               |                                                            | 35              | 0      | 16               | 0      | 473 | 7      | 531                                               |                                                     |                                                            |
