# Supplementary material
Source: PubMed Central journal article supplement (PMC5974185)
Supplement: 41431_2018_129_MOESM6_ESM.pdf [file 41431_2018_129_MOESM6_ESM.pdf]

**Table S6: Coding homozygous variants**

| Patients       | Genes                                        | Variant                                      | Human                                                                                                                      | Mouse                                                                                      |
|----------------|----------------------------------------------|----------------------------------------------|----------------------------------------------------------------------------------------------------------------------------|--------------------------------------------------------------------------------------------|
| HD09C          | <i>FOCAD</i>                                 | NC_000009.11:g.[20990242G>A];[20990242G>A]   | ND                                                                                                                         | ND                                                                                         |
| HK164C         | <i>BRD1</i>                                  | NC_000022.10:g.[50191485G>A];[50191485G>A]   | Associated with schizophrenia                                                                                              | CNS/PNS                                                                                    |
|                | <i>C5orf42</i>                               | NG_032772.1:g.[84908G>A];[84908G>A]          | <b>Joubert syndrome 17 (AR)<br/>ALSO HSCR features</b>                                                                     | Multiorgan abnormalities                                                                   |
|                | <i>GINS4</i>                                 | NC_000008.10:g.[41399354G>A];[41399354G>A]   | ND                                                                                                                         | ND                                                                                         |
|                | <i>GLRX3</i>                                 | NC_000010.10:g.[131977636A>G];[131977636A>G] | ND                                                                                                                         | ND                                                                                         |
|                | <i>HK2</i>                                   | NC_000002.11:g.[75105837G>A];[75105837G>A]   | Diabetes Mellitus, Insulin-Dependent, 2                                                                                    | Abnormal glucose/insulin metabolism                                                        |
|                | <i>ITGB5</i>                                 | NC_000003.11:g.[124578170G>C];[124578170G>C] | ND                                                                                                                         | ND                                                                                         |
|                | <i>NEK1</i>                                  | NG_027982.1:g.[109891G>A];[109891G>A]        | <b>Short-rib thoracic dysplasia.<br/>Associated with Polycystic kidney disease (PKD) and amyotrophic lateral sclerosis</b> | Abnormal renal tubule morphology, kidney cysts. Abnormal CNS and craniofacial development. |
|                | <i>PLAT</i>                                  | NG_023264.1:g.[33661T>C];[33661T>C]          | Familial thrombophilia                                                                                                     | Human tissue plasminogen activator-Cre mouse: aganglionic megacolon                        |
|                | <i>PPP2R3A</i>                               | NG_029234.1:g.[142637A>G];[142637A>G]        | ND                                                                                                                         | ND                                                                                         |
|                | <i>RRP7A</i>                                 | NC_000022.10:g.[42912117G>A];[42912117G>A]   | ND                                                                                                                         | ND                                                                                         |
| <i>STXBP5L</i> | NC_000003.11:g.[120977910G>A];[120977910G>A] | ND                                           | ND                                                                                                                         |                                                                                            |
| <i>USP42</i>   | NC_000007.13:g.[6196402A>G];[6196402A>G]     | ND                                           | ND                                                                                                                         |                                                                                            |
| <i>VRK2</i>    | NG_029717.2:g.[256898G>A];[256898G>A]        | ND                                           | ND                                                                                                                         |                                                                                            |
| HK180C         | <i>XRN2</i>                                  | NC_000020.10:g.[21327108G>A];[21327108G>A]   | ND                                                                                                                         | ND                                                                                         |
| HK96C          | <i>BICD2</i>                                 | NG_033908.1:g.[50349C>T];[50349C>T]          | Spinal muscular atrophy, lower extremity-predominant 2.                                                                    | ND                                                                                         |
| VH105C         | <i>PLEKHA4</i>                               | NC_000019.9:g.[49348658C>T];[49348658C>T]    | ND                                                                                                                         | ND                                                                                         |
| VH108C         | <i>SEMA7A</i>                                | NG_011733.1:g.[24026G>A];[24026G>A]          | Antigen JMH blood group system. Exotropia. Hemoglobinuria                                                                  | Olfactory tract is impaired                                                                |
