# Supplementary material
Source: PubMed Central journal article supplement (PMC5974185)
Supplement: 41431_2018_129_MOESM7_ESM.pdf [file 41431_2018_129_MOESM7_ESM.pdf]

**Table S7: Coding compound heterozygous variants**

| Patients | Gene           | Variants (paternal/maternal)                    | Disorders in humans                                                                                                                            | Mouse phenotype                                                                                                                                                                                                                           |
|----------|----------------|-------------------------------------------------|------------------------------------------------------------------------------------------------------------------------------------------------|-------------------------------------------------------------------------------------------------------------------------------------------------------------------------------------------------------------------------------------------|
| HD09C    | <i>BRD4</i>    | NC_000019.9:g.[15391074C>T];[15349596C>A]       | Translocation breakpoints in 2 patients with t(15;19)(q13;p13.1) carcinomas                                                                    | ND                                                                                                                                                                                                                                        |
|          | <i>MAGI3</i>   | NC_000001.10:g.[114216074A>G];[114133195T>C]    | ND                                                                                                                                             | ND                                                                                                                                                                                                                                        |
|          | <i>FGFRL1</i>  | NC_000004.11:g.[1018102G>A];[1018242G>A]        | <b>Wolf-Hirschhorn syndrome (WHS)</b>                                                                                                          | Wolf-Hirschhorn syndrome is recapitulated in <i>Fgfr1</i> null mice; Development delay. Many organs affected                                                                                                                              |
|          | <i>SSH2</i>    | NC_000017.10:g.[27958079C>T];[27958200G>A]      | ND                                                                                                                                             | ND                                                                                                                                                                                                                                        |
|          | <i>TFR2</i>    | NC_000007.13:g.[100238661G>A];[100225717T>C]    | Hemochromatosis, Type 3                                                                                                                        | Abnormal iron homeostasis                                                                                                                                                                                                                 |
| HK164C   | <i>DOCK8</i>   | NG_017007.1:g.[176505C>G;253791C>G];[208237C>T] | <b>Hyper-Ige Recurrent Infection Syndrome, Autosomal Recessive and Autosomal Dominant Non-Syndromic Intellectual Disability</b>                | <b>DOCK8-deficient mice:impaired induction of antimicrobial peptides in the colon</b>                                                                                                                                                     |
|          | <i>CDC14A</i>  | NG_051602.1:g.[159238G>A];[84272C>A]            | Nonsyndromic Deafness (AR)                                                                                                                     | ND                                                                                                                                                                                                                                        |
|          | <i>FRAS1</i>   | NG_015812.1:g.[454891A>G];[388680A>C]           | Cryptophthalmos, cutaneous syndactyly and genitourinary anomalies (AR)                                                                         | Abnormal multiorgan development                                                                                                                                                                                                           |
|          | <i>SLC24A1</i> | NG_031968.2:g.[39211A>G];[19238G>A]             | Congenital stationary night blindness (AR)                                                                                                     | Downregulation of Wnt pathway after Wnt3A stimulation                                                                                                                                                                                     |
| HK180C   | <i>CUL7</i>    | NG_016205.1:g.[21037C>G];[10418C>T]             | 3M syndrome (AR). Dubowitz's syndrome                                                                                                          | Lethal. Respiratory / vascular distress                                                                                                                                                                                                   |
|          | <i>ACOX2</i>   | NC_000003.11:g.[58510169C>T];[58512313C>T]      | ND                                                                                                                                             | ND                                                                                                                                                                                                                                        |
|          | <i>ARFGEF3</i> | NC_000006.11:g.[138531086G>T];[138607972G>C]    | ND                                                                                                                                             | ND                                                                                                                                                                                                                                        |
|          | <i>NACAD</i>   | NC_000007.13:g.[45121368G>C];[45124560C>T]      | ND                                                                                                                                             | ND                                                                                                                                                                                                                                        |
| HK9C     | <i>LAMA5</i>   | NG_050626.1:g.[53760G>A];[57239G>A]             | ND                                                                                                                                             | Arrest of hair development; glomerulopathies; deficient Shh                                                                                                                                                                               |
|          | <i>RADIL</i>   | NC_000007.13:g.[4874645C>T];[4876173A>G]        | ND                                                                                                                                             | <b>Knockdown of radil in zebrafish embryos resulted in multiple defects in neural crest cell-derived lineages including enteric neurons. These defects were primarily due to the diminished migratory capacity of neural crest cells.</b> |
| VH105C   | <i>CUL7</i>    | NG_016205.1:g.[12938C>G];[20980G>A]             | 3M syndrome (AR). Dubowitz's syndrome                                                                                                          | Lethal. Respiratory / vascular distress                                                                                                                                                                                                   |
|          | <i>ZSWIM4</i>  | NC_000019.9:g.[13915803C>T];[13919738G>T]       | ND                                                                                                                                             | ND                                                                                                                                                                                                                                        |
| VH106C   | <i>SYNE1</i>   | NC_000006.11:g.[152730698G>A];[152631870G>A]    | SYNE1-Related Autosomal Recessive Cerebellar Ataxia. Emery-Dreifuss muscular dystrophy 4, autosomal dominant (AD)                              | SYNE2 is required for neuronal nuclear movement and for neuronal migration and development. Hindlimb weakness and an abnormal gait                                                                                                        |
| VH108C   | <i>RFC2</i>    | NG_008102.1:g.[19397G>A];[5089C>T]              | Williams-Beuren Syndrome critical region. Infantile hypercalcemia supravulvar aortic stenosis syndrome<br>supravulvar aortic stenosis syndrome | Postnatal growth delay                                                                                                                                                                                                                    |

ND: no described; AR: autosomal recessive; AD: Autosomal dominant; The alleles are ordered by the parental origin: paternal/maternal.
