# Supplementary material
Source: PubMed Central journal article supplement (PMC5974185)
Supplement: 41431_2018_129_MOESM8_ESM.pdf [file 41431_2018_129_MOESM8_ESM.pdf]

**Table S8: Genic regions recurrently affected by SNVs and indels**

| Gene          | Patients | Reason for gene selection | Inheritance | Variant                                    |
|---------------|----------|---------------------------|-------------|--------------------------------------------|
| <i>ACOX2</i>  | HK180C   | Seed -CH-                 | Maternal    | NC_000003.11:g.[58510169C>T];[58512313C>T] |
|               | VH106C   |                           |             | NC_000003.11:g.58520147C>T                 |
| <i>CDC14A</i> | HK164C   | Seed -CH-                 | Paternal    | NG_051602.1:g.[159238G>A];[84272C>A]       |
|               | HD09C    |                           |             | NG_051602.1:g.159358C>G                    |
| <i>CUL7</i>   | HK180C   | Seed -CH-                 | Paternal    | NG_016205.1:g.[21037C>G];[10418C>T]        |
|               | VH105C   | Seed -CH-                 |             | NG_016205.1:g.[12938C>G];[20980G>A]        |
|               | HD09C    |                           |             | NG_016205.1:g.18757A>G                     |
| <i>FGFRL1</i> | HD09C    | Seed -CH-                 | Paternal    | NC_000004.11:g.[1018102G>A];[1018242G>A]   |
|               | VH106C   |                           |             | NC_000004.11:g.1016203G>C                  |
| <i>FRAS1</i>  | HD09C    |                           | Maternal    | NG_015812.1:g.228865_228866insT            |
|               | HK164C   | Seed -CH-                 |             | NG_015812.1:g.[454891A>G];[388680A>C]      |
| <i>GLI2</i>   | HK164C   | ENS gene -Table S3-       | Paternal    | NG_009030.1:g.195951G>A                    |
|               | VH105C   | ENS gene -Table S3-       | Maternal    | NG_009030.1:g.5166G>A                      |
| <i>LAMA5</i>  | HK9C     | Seed -CH-                 | Paternal    | NG_050626.1:g.[53760G>A];[57239G>A]        |
|               | VH106C   |                           |             | NG_050626.1:g.51487C>T                     |

|                |        |                                         |                     |                                       |
|----------------|--------|-----------------------------------------|---------------------|---------------------------------------|
|                | VH108C |                                         | Maternal            | NG_050626.1:g.57903T>G                |
|                | HK96C  |                                         | Maternal            | NG_050626.1:g.44336C>T                |
| <i>NEK1</i>    | HK164C | Seed -Homo-                             |                     | NG_027982.1:g.[109891G>A];[109891G>A] |
|                | HK97C  |                                         | Paternal            | NG_027982.1:g.55474A>G                |
|                | VH106C |                                         | Maternal            | NG_027982.1:g.55474A>G                |
| <i>NRG1</i>    | VH106C | Seed -De novo-; ENS gene -<br>Table S3- | <i>NCDS de novo</i> | NG_012005.2:g.667454G>C               |
|                | VH108C |                                         | <i>NCDS de novo</i> | NG_012005.2:g.146124A>G               |
|                | HK164C |                                         | <i>NCDS de novo</i> | NG_012005.2:g.92222G>T                |
| <i>PLXNB1</i>  | HK180C | ENS gene -Table S3-                     | Paternal            | NC_000003.11:g.48453691G>T            |
|                | VH106C | ENS gene -Table S3-                     | Maternal            | NC_000003.11:g.48453691G>T            |
| <i>RET</i>     | HD09C  | ENS gene -Table S3-                     | Paternal            | NG_007489.1:g.39340G>A                |
|                | HK180C | ENS gene -Table S3-                     | Paternal            | NG_007489.1:g.30277G>A                |
|                | HK9C   | ENS gene -Table S3-                     | Maternal            | NG_007489.1:g.52819C>T                |
| <i>SLC24A1</i> | HK164C | Seed -CH-                               |                     | NG_031968.2:g.[39211A>G];[19238G>A]   |
|                | HK97C  |                                         | Paternal            | NG_031968.2:g.19346C>G                |
| <i>VRK2</i>    | HK164C | Seed -Homo-                             |                     | NG_029717.2:g.[256898G>A];[256898G>A] |
|                | HD09C  |                                         | Maternal            | NG_029717.2:g.186911A>G               |

|             |        |                                         |                     |                             |
|-------------|--------|-----------------------------------------|---------------------|-----------------------------|
|             | HK97C  |                                         | Maternal            | NG_029717.2:g.237075A>C     |
| <i>ZEB2</i> | HK164C | Seed -de novo-; ENS gene -<br>Table S3- | <i>NCDS de novo</i> | NC_000002.11:g.145137510C>T |
|             | HK97C  | ENS gene -Table S3-                     | Paternal            | NG_016431.1:g.125370A>C     |

CH: compound heterozygous; *RET* mutations have been described previously and are known to be present in healthy individuals.
