# Supplementary material
Source: PubMed Central journal article supplement (PMC5974185)
Supplement: 41431_2018_129_MOESM9_ESM.pdf [file 41431_2018_129_MOESM9_ESM.pdf]

**Table S9: Genomic profile of each patient**

| Patients      | Gene <sup>a</sup> | Variant                                               | Reason for gene selection              | Type                                        | Human                                                                                                                               |
|---------------|-------------------|-------------------------------------------------------|----------------------------------------|---------------------------------------------|-------------------------------------------------------------------------------------------------------------------------------------|
| HD09C         | <i>CCT2</i>       | NC_000012.11:g.69993654G>A                            | Seed                                   | <i>De novo</i> CDS                          | <b>BBS syndrome. HSCR is a secondary feature sometimes associated with BBS. Leber Congenital Amaurosis (hereditary eye disease)</b> |
|               | <i>VRK2</i>       | NG_029717.2:g.186911A>G                               | Seed + Homo in patient HK164-          | Maternally inherited                        | ND                                                                                                                                  |
|               | <i>VASH1</i>      | NC_000014.8:g.77242233A>G                             | Seed                                   | <i>De novo</i> CDS                          | ND                                                                                                                                  |
|               | <i>FOCAD</i>      | NC_000009.11:g.[20990242G>A];[20990242G>A]            | Seed                                   | Homo                                        | ND                                                                                                                                  |
|               | <i>BRD4</i>       | NC_000019.9:g.[15391074C>T];[15349596C>A]             | Seed                                   | CH                                          | Translocation breakpoints in 2 patients with t(15;19)(q13;p13.1) carcinomas                                                         |
|               | <i>FGFRL1</i>     | NC_000004.11:g.[1018102G>A];[1018242G>A]              | Seed                                   | CH                                          | Wolf-Hirschhorn syndrome (WHS)                                                                                                      |
|               | <i>MAGI3</i>      | NC_000001.10:g.[114216074A>G];[114133195T>C]          | Seed                                   | CH                                          | ND                                                                                                                                  |
|               | <i>SSH2</i>       | NC_000017.10:g.[27958079C>T];[27958200G>A]            | Seed                                   | CH                                          | ND                                                                                                                                  |
|               | <i>TFR2</i>       | NC_000007.13:g.[100238661G>A];[100225717T>C]          | Seed                                   | CH                                          | Hemochromatosis, Type 3                                                                                                             |
|               | <i>RET</i>        | NG_007489.1:g.39340G>A                                | ENS candidate; Table S3                | Paternally inherited                        | HSCR; MEN                                                                                                                           |
|               | <i>CDC14A</i>     | NG_051602.1:g.159358C>G                               | Seed + CH in patient HK164-            | Paternally inherited                        | Nonsyndromic Deafness (AR)                                                                                                          |
|               | <i>FRAS1</i>      | NG_015812.1:g.228865_228866insT                       | Seed + CH in patient HK164-            | Maternally inherited                        | Cryptophthalmos, cutaneous syndactyly and genitourinary anomalies (AR)                                                              |
|               | <i>CUL7</i>       | NG_016205.1:g.18757A>G                                | Seed + CH in patients HK180 and VH105- | Paternally inherited                        | 3M syndrome (AR), Dubowitz's syndrome                                                                                               |
| <i>ADRA1A</i> | exonic deletion   | Genetic interaction with <i>SSH2</i> and <i>FOCAD</i> | Maternally inherited                   | Horner's Syndrome and Prostatic Hypertrophy |                                                                                                                                     |

<sup>a</sup> Co-existing mutated interacting genes according to the STRING database v.10.0 are bold and highlighted in grey

| Patients       | Gene <sup>a</sup>                          | Variant                                      | Reason for gene selection           | Type                        | Human                                                                                                                       |
|----------------|--------------------------------------------|----------------------------------------------|-------------------------------------|-----------------------------|-----------------------------------------------------------------------------------------------------------------------------|
| HK164C         | <i>BRD1</i>                                | NC_000022.10:g.[50191485G>A];[50191485G>A]   | Seed                                | Homo                        | Associated with schizophrenia                                                                                               |
|                | <i>C5orf42</i>                             | NG_032772.1:g.[84908G>A];[84908G>A]          | Seed                                | Homo                        | Joubert syndrome 17 (AR) ALSO HSCR features                                                                                 |
|                | <i>GINS4</i>                               | NC_000008.10:g.[41399354G>A];[41399354G>A]   | Seed                                | Homo                        | ND                                                                                                                          |
|                | <i>GLRX3</i>                               | NC_000010.10:g.[131977636A>G];[131977636A>G] | Seed                                | Homo                        | ND                                                                                                                          |
|                | <i>HK2</i>                                 | NC_000002.11:g.[75105837G>A];[75105837G>A]   | Seed                                | Homo                        | Diabetes Mellitus, Insulin-Dependent, 2                                                                                     |
|                | <i>ITGB5</i>                               | NC_000003.11:g.[124578170G>C];[124578170G>C] | Seed                                | <b>Homo</b>                 | <b>ND</b>                                                                                                                   |
|                | <i>COL6A3</i>                              | NG_008676.1:g.50512C>A                       | Interacting partner of <i>ITGB5</i> | <b>Maternally inherited</b> | <b>Ullrich Congenital Muscular Dystrophy 1. Bethlem Myopathy 1. Dystonia 27</b>                                             |
|                | <i>LAMB2</i>                               | NG_008094.1:g.5528C>A                        | Interacting partner of <i>ITGB5</i> | <b>Maternally inherited</b> | <b>Pierson syndrome (AR); Congenital nephrotic syndrome</b>                                                                 |
|                | <i>ITGA2</i>                               | NG_008330.1:g.76609G>A                       | Interacting partner of <i>ITGB5</i> | <b>Maternally inherited</b> | <b>Bleeding Disorder, Platelet-Type, 9</b>                                                                                  |
|                | <i>COL1A2</i>                              | NG_007405.1:g.36442C>A                       | Interacting partner of <i>ITGB5</i> | <b>Maternally inherited</b> | <b>Ehlers-Danlos Syndrome, Type VII (AD). Osteogenesis Imperfecta</b>                                                       |
|                | <i>SORBS1</i>                              | NG_034041.1:g.133941C>T                      | Interacting partner of <i>ITGB5</i> | <b>Paternally inherited</b> | <b>ND</b>                                                                                                                   |
|                | <i>COL6A2</i>                              | NG_008675.1:g.36331G>C                       | Interacting partner of <i>ITGB5</i> | <b>Paternally inherited</b> | <b>Ullrich Congenital Muscular Dystrophy 1. Bethlem Myopathy 1. Myosclerosis (AR)</b>                                       |
|                | <i>ZEB2</i>                                | NC_000002.11:g.145137510C>T                  | Seed + ENS-candidate; Table S3      | <i>De novo</i> NCDS         | Mowat-Wilson Syndrome (AD)                                                                                                  |
|                | <i>NEK1</i>                                | NG_027982.1:g.[109891G>A];[109891G>A]        | Seed                                | Homo                        | <b>Short-rib thoracic dysplasia. Associated with ALS, Polycystic kidney disease (PKD) and amyotrophic lateral sclerosis</b> |
|                | <i>NRG1</i>                                | NG_012005.2:g.92222G>T                       | Seed + ENS- candidate; Table S3     | <i>De novo</i> NCDS         | Associated with HSCR and schizophrenia                                                                                      |
|                | <i>PLAT</i>                                | NG_023264.1:g.[33661T>C];[33661T>C]          | Seed                                | Homo                        | Familial thrombophilia                                                                                                      |
| <i>PPP2R3A</i> | NG_029234.1:g.[142637A>G];[142637A>G]      | Seed                                         | Homo                                | ND                          |                                                                                                                             |
| <i>RRP7A</i>   | NC_000022.10:g.[42912117G>A];[42912117G>A] | Seed                                         | Homo                                | ND                          |                                                                                                                             |

| Patients              | Gene <sup>a</sup>                   | Variant                                         | Reason for gene selection           | Type                                          | Human                                                                                                                           |
|-----------------------|-------------------------------------|-------------------------------------------------|-------------------------------------|-----------------------------------------------|---------------------------------------------------------------------------------------------------------------------------------|
| HK164C<br>(continued) | <i>STXBP5L</i>                      | NC_000003.11:g.[120977910G>A];[120977910G>A]    | Seed                                | Homo                                          | ND                                                                                                                              |
|                       | <i>USP42</i>                        | NC_000007.13:g.[6196402A>G];[6196402A>G]        | Seed                                | Homo                                          | ND                                                                                                                              |
|                       | <i>VRK2</i>                         | NG_029717.2:g.[256898G>A];[256898G>A]           | Seed                                | Homo                                          | ND                                                                                                                              |
|                       | <i>CDC14A</i>                       | NG_051602.1:g.[159238G>A];[84272C>A]            | Seed                                | CH                                            | Nonsyndromic Deafness (AR)                                                                                                      |
|                       | <i>DOCK8</i>                        | NG_017007.1:g.[176505C>G;253791C>G];[208237C>T] | Seed                                | CH                                            | <b>Hyper-Ige Recurrent Infection Syndrome, Autosomal Recessive and Autosomal Dominant Non-Syndromic Intellectual Disability</b> |
|                       | <i>KANK1</i>                        | NG_016331.2:g.246747_246748insAGCTGT            | Interacting partner of <i>DOCK8</i> | Paternally inherited                          | <b>Cerebral Palsy Spastic Quadriplegic 2 (CPSQ2)</b>                                                                            |
|                       | <i>FRAS1</i>                        | NG_015812.1:g.[454891A>G];[388680A>C]           | Seed                                | CH                                            | Cryptophthalmos, cutaneous syndactyly and genitourinary anomalies (AR)                                                          |
| <i>SLC24A1</i>        | NG_031968.2:g.[39211A>G];[19238G>A] | Seed                                            | CH                                  | Congenital stationary night blindness (AR)    |                                                                                                                                 |
| <i>GLI2</i>           | NG_009030.1:g.195951G>A             | ENS candidate; Table S3                         | Maternally inherited                | Holoprosencephaly. Culler-Jones Syndrome (AD) |                                                                                                                                 |
| HK180C                | <i>XRN2</i>                         | NC_000020.10:g.[21327108G>A];[21327108G>A]      | Seed                                | Homo                                          | ND                                                                                                                              |
|                       | <i>ACOX2</i>                        | NC_000003.11:g.[58510169C>T];[58512313C>T]      | Seed                                | CH                                            | ND                                                                                                                              |
|                       | <i>ARFGEF3</i>                      | NC_000006.11:g.[138531086G>T];[138607972G>C]    | Seed                                | CH                                            | ND                                                                                                                              |
|                       | <i>DCC</i>                          | NG_013341.2:g.651331G>A                         | Seed + ENS-candidate; Table S3      | De novo NCDS                                  | Mirror Movements 1 and Colorectal Cancer                                                                                        |
|                       | <i>NACAD</i>                        | NC_000007.13:g.[45121368G>C];[45124560C>T]      | Seed                                | CH                                            | ND                                                                                                                              |
|                       | <i>CUL7</i>                         | NG_016205.1:g.[21037C>G];[10418C>T]             | Seed                                | CH                                            | <b>3M syndrome (AR). Dubowitz's syndrome</b>                                                                                    |
|                       | <i>ANAPC2</i>                       | NC_000009.11:g.140079485C>A                     | Interacting partner of <i>CUL7</i>  | Maternally inherited                          | ND                                                                                                                              |
| <i>RET</i>            | NG_007489.1:g.30277G>A              | ENS-candidate; Table S3                         | Paternally inherited                | HSCR; MEN                                     |                                                                                                                                 |

| Patients              | Gene <sup>a</sup>      | Variant                                 | Reason for gene selection           | Type                                                                | Human                                                                                                                |
|-----------------------|------------------------|-----------------------------------------|-------------------------------------|---------------------------------------------------------------------|----------------------------------------------------------------------------------------------------------------------|
| HK180C<br>(continued) | <i>PLXNB1</i>          | NC_000003.11:g.48453691G>T              | ENS-candidate; Table S3             | Paternally inherited                                                | Associated with schizophrenia                                                                                        |
| HK96C                 | <i>BICD2</i>           | NG_033908.1:g.[50349C>T];[50349C>T]     | Seed                                | Homo                                                                | Spinal muscular atrophy, lower extremity-predominant 2.                                                              |
|                       | <i>ELAVL4</i>          | NC_000001.10:g.50572019T>G              | ENS-candidate; Table S3             | Paternally inherited                                                | Paraneoplastic neurologic disorders                                                                                  |
|                       | <i>SERPINI1</i>        | NG_008217.1:g.59951A>G                  | ENS-candidate; Table S3             | Paternally inherited                                                | Familial encephalopathy with neuroserpin inclusion bodies (FENIB)                                                    |
|                       | <i>CTNNAL1</i>         | NC_000009.11:g.111775677_111775705del29 | ENS-candidate; Table S3             | Maternally inherited                                                | ND                                                                                                                   |
|                       | <i>IKBKAP</i>          | NC_000009.11:g.111688824G>T             | ENS-candidate; Table S3             | Maternally inherited                                                | Hereditary Sensory and Autonomic, Type III (Familial dysautonomia)                                                   |
|                       | <i>LAMA5</i>           | NG_050626.1:g.44336C>T                  | Seed + CH in patient HK9C-          | Maternally inherited                                                | ND                                                                                                                   |
|                       | <i>ITGA6</i>           | NG_008853.1:g.81617_81618insA           | Interacting partner of <i>LAMA5</i> | Paternally inherited                                                | Amelogenesis imperfecta (AR)                                                                                         |
| <i>ITGA2B</i>         | NG_008331.1:g.13600G>A | Interacting partner of <i>LAMA5</i>     | Paternally inherited                | Bleeding Disorder, Platelet-Type, 16. Glanzmann Thrombasthenia (AR) |                                                                                                                      |
| HK97C                 | <i>NEK1</i>            | NG_027982.1:g.55474A>G                  | Seed + Homo in patient HK164-       | Maternally inherited                                                | Short-rib thoracic dysplasia. Associated with ALS, Polycystic kidney disease (PKD) and amyotrophic lateral sclerosis |
|                       | <i>PFKL</i>            | NG_034033.1:g.18977A>G                  | ENS-candidate; Table S3             | Paternally inherited                                                | ND                                                                                                                   |
|                       | <i>PCNT</i>            | NG_008961.1:g.82476C>T                  | Interacting partner of <i>PFKL</i>  | Maternally inherited                                                | Microcephalic osteodysplastic primordial dwarfism type 2. Primary microcephaly type 6 (AR). Seckel syndrome type 4   |
|                       | <i>PCNT</i>            | NG_008961.1:g.92767C>T                  | Interacting partner of <i>PFKL</i>  | Maternally inherited                                                | Microcephalic osteodysplastic primordial dwarfism type 2. Primary microcephaly type 6 (AR). Seckel syndrome type 4   |
|                       | <i>SLC24A1</i>         | NG_031968.2:g.19346C>G                  | Seed + CH in patient HK164-         | Paternally inherited                                                | Congenital stationary night blindness (AR)                                                                           |
|                       | <i>SMO</i>             | NG_023340.1:g.19566G>A                  | ENS-candidate; Table S3             | Paternally inherited                                                | Curry-Jones syndrome                                                                                                 |
|                       | <i>VRK2</i>            | NG_029717.2:g.237075A>C                 | Seed + CH in patient HK164-         | Maternally inherited                                                | ND                                                                                                                   |
|                       | <i>ZEB2</i>            | NG_016431.1:g.125370A>C                 | ENS-candidate; Table S3             | Paternally inherited                                                | Mowat-Wilson Syndrome (AD)                                                                                           |
| HK9C                  | <i>CYP26A1</i>         | NG_008067.1:g.7481A>G                   | Seed                                | <i>De novo</i> CDS                                                  | Diffuse idiopathic skeletal hyperostosis                                                                             |

| Patients            | Gene <sup>a</sup>         | Variant                                      | Reason for gene selection                          | Type                     | Human                                                                                                                            |
|---------------------|---------------------------|----------------------------------------------|----------------------------------------------------|--------------------------|----------------------------------------------------------------------------------------------------------------------------------|
| HK9C<br>(continued) | <i>LAMA5</i>              | NG_050626.1:g.[53760G>A];[57239G>A]          | Seed                                               | CH                       | ND                                                                                                                               |
|                     | <i>CD44</i>               | NG_008937.1:g.81028A>G                       | Interacting partner of <i>LAMA5</i>                | Paternally inherited     | ND                                                                                                                               |
|                     | <i>LAMA1</i>              | NG_034251.1:g.171893T>C                      | Interacting partner of <i>LAMA5</i>                | Paternally inherited     | Poretti-Boltshauser syndrome (PTBHS), AR                                                                                         |
|                     | <i>RADIL</i>              | NC_000007.13:g.[4874645C>T];[4876173A>G]     | Seed                                               | CH                       | ND                                                                                                                               |
|                     | <i>RET</i>                | NG_007489.1:g.52819C>T                       | ENS-candidate; Table S3                            | Maternally inherited     | HSCR; MEN                                                                                                                        |
|                     | <i>GLI3</i>               | NG_008434.1:g.196497T>A                      | ENS-candidate; Table S3                            | Maternally inherited     | Greig cephalopolysyndactyly syndrome. Postaxial polydactyly types a1 and b. Preaxial polydactyly type 4. Pallister-hall syndrome |
| VH105C              | <i>PLEKHA4</i>            | NC_000019.9:g.[49348658C>T];[49348658C>T]    | Seed                                               | Homo                     | ND                                                                                                                               |
|                     | <i>ZSWIM4</i>             | NC_000019.9:g.[13915803C>T];[13919738G>T]    | Seed                                               | CH                       | ND                                                                                                                               |
|                     | <i>CUL7</i>               | NG_016205.1:g.[12938C>G];[20980G>A]          | Seed                                               | CH                       | 3M syndrome (AR). Dubowitz's syndrome                                                                                            |
|                     | <i>FBXW11</i>             | NG_009275.1:g.111834G>A                      | Interacting partner of <i>GLI2</i> and <i>CUL7</i> | Paternally inherited     | Deafness, neurosensory deafness (AR)                                                                                             |
|                     | <i>GLI2</i>               | NG_009030.1:g.5166G>A                        | ENS-candidate; Table S3                            | Paternally inherited     | Holoprosencephaly. Culler-Jones Syndrome (AD)                                                                                    |
| VH106C              | <i>SYNE1</i>              | NC_000006.11:g.[152730698G>A];[152631870G>A] | Seed                                               | CH                       | SYNE1-Related Autosomal Recessive Cerebellar Ataxia. Emery-Dreifuss muscular dystrophy 4, autosomal dominant (AD)                |
|                     | <i>ERBB4</i>              | NG_011805.1:g.835055_835059delAAACA          | Seed + ENS-candidate; Table S3                     | <i>De novo</i> NCDS      | ErbB4-Related Amyotrophic Lateral Sclerosis                                                                                      |
|                     | <i>NRG1</i>               | NG_012005.2:g.667454G>C                      | Seed + ENS-candidate; Table S3                     | <i>De novo</i> NCDS      | Associated with HSCR and schizophrenia                                                                                           |
|                     | <i>NOTCH1</i>             | NG_007458.1:g.44235G>A                       | ENS-candidate; Table S3                            | Paternally inherited     | Adams-Oliver syndrome                                                                                                            |
|                     | <i>ACOX2</i>              | NC_000003.11:g.58520147C>T                   | Seed + CH in patient HK180-                        | Maternally inherited     | ND                                                                                                                               |
| <i>FGFRL1</i>       | NC_000004.11:g.1016203G>C | Seed + CH in patient HD9-                    | Paternally inherited                               | Wolf-Hirschhorn Syndrome |                                                                                                                                  |

| Patients              | Gene <sup>a</sup> | Variant                             | Reason for gene selection              | Type                    | Human                                                                                                                      |
|-----------------------|-------------------|-------------------------------------|----------------------------------------|-------------------------|----------------------------------------------------------------------------------------------------------------------------|
| VH106C<br>(continued) | <i>NEK1</i>       | NG_027982.1:g.55474A>G              | Seed + Homo in patient<br>HK164-       | Paternally<br>inherited | Short-rib thoracic dysplasia. Associated<br>with ALS, Polycystic kidney disease (PKD)<br>and amyotrophic lateral sclerosis |
|                       | <i>LAMA5</i>      | NG_050626.1:g.51487C>T              | Seed + CH in patient<br>HK9C-          | Paternally<br>inherited | ND                                                                                                                         |
|                       | <i>ITGB6</i>      | NG_042041.1:g.78833G>A              | Interacting partner of<br><i>LAMA5</i> | Maternally<br>inherited | Amelogenesis imperfecta (AR)                                                                                               |
|                       | <i>PLXNB1</i>     | NC_000003.11:g.48453691G>T          | ENS-candidate; Table<br>S3             | Maternally<br>inherited | Associated with schizophrenia                                                                                              |
|                       | <i>SEMA3A</i>     | NG_011489.1:g.210732delT            | Seed + ENS-candidate;<br>Table S3      | <i>De novo</i> NCDS     | Hypogonadotropic Hypogonadism 16                                                                                           |
| VH108C                | <i>SEMA7A</i>     | NG_011733.1:g.[24026G>A];[24026G>A] | Seed                                   | Homo                    | Antigen JMH blood group system.<br>Exotropia. Hemoglobinuria                                                               |
|                       | <i>POLD3</i>      | NC_000011.9:g.74336572A>G           | Interacting partner of<br><i>RFC2</i>  | Paternally<br>inherited | Involved in DNA replication and repair                                                                                     |
|                       | <i>RFC2</i>       | NG_008102.1:g.[19397G>A];[5089C>T]  | Seed                                   | CH                      | Williams-Beuren Syndrome critical<br>region. Infantile hypercalcemia<br>supravalvar aortic stenosis syndrome               |
|                       | <i>LAMA5</i>      | NG_050626.1:g.57903T>G              | Seed + CH in patient<br>HK9C-          | Maternally<br>inherited | ND                                                                                                                         |
|                       | <i>MAPT</i>       | NG_007398.1:g.104533C>G             | ENS-candidate; Table<br>S3             | Paternally<br>inherited | Frontotemporal dementia (FTD).<br>Alzheimer Disease, Progressive<br>Supranuclear Palsy 1 (PSNP1).<br>Parkinson Disease     |
|                       | <i>ATP13A2</i>    | NG_009054.1:g.20831C>G              | Interacting partner of<br><i>MAPT</i>  | Maternally<br>inherited | Early-onset Parkinson disease 15 (AR).<br>Kufor-rakeb syndrome                                                             |
|                       | <i>MARK1</i>      | NC_000001.10:g.220809273C>G         | Interacting partner of<br><i>MAPT</i>  | Maternally<br>inherited | Alzheimer Disease. May be associated<br>with susceptibility to autism.                                                     |
|                       | <i>SYK</i>        | NG_017046.1:g.82046A>G              | Interacting partner of<br><i>MAPT</i>  | Maternally<br>inherited | Nasu-Hakola disease (NHD)                                                                                                  |
|                       | <i>NRG1</i>       | NG_012005.2:g.146124A>G             | Seed + ENS-candidate;<br>Table S3      | <i>De novo</i> NCDS     | Associated with HSCR and schizophrenia                                                                                     |
|                       | <i>POFUT1</i>     | NG_033906.1:g.5075C>T               | ENS-candidate; Table<br>S3             | Maternally<br>inherited | Dowling-Degos disease-2 (DDD2) (AD)                                                                                        |
